# Supplementary material for: Asymmetric neurogenic commitment of retinal progenitors involves Notch through the endocytic pathway
Source: eLife. 2020 Nov 3;9:e60462. doi: 10.7554/eLife.60462 (PMC7679139; doi:10.7554/eLife.60462)
Supplement: Figure 1—source data 1. [file elife-60462-fig1-data1.xlsx]

## Sheet: Sheet1
	Experiment from 20200210 on 48 hpf fish control and treated with 10 uM LY411575
	All measurements in the central slices
	Used actb1:HRAS-mKate channel for measurements		RNE thickness					Retinal diameter (on the slice with the biggest dimension)
	Control		Z- slice	Nasal	Central	temporal		Z- slice
		fish1_w0000	37/92	74.068	70.29	70.802		50/92	267.519
		fish2_w0000	54/124	73.256	68.405	72.399		54/124	271.154
		fish3_w0000	67/114	77.602	77.694	71.488		67/114	265.473
		fish4_w0000	72/138	77.993	71.348	77.201		72/138	253.38
		fish5_w0000	77/145	73.55	69.244	68.383		77/145	248.114
		fish6_w0000	38/94	75.99	74.081	75.381		38/94	270.365
	LY411575 10 uM	fish1_w0000	65/134	62.143	68.712	65.638	this measured on ath5	65/134	235116
		fish2_w0000	32/97	67.597	58.189	64.043		32/97	225.527
		fish3_w0000	38/103	64.237	67.325	68.663		38/103	241.721
		fish4_w0000	32/110	60.592	66.445	66.778		62/110	233.747
		fish5_w0000	55/114	66.637	64.966	68.668		55/114	232.348
		fish6_w0000	65/103	59.679	59.215	69.533		65/103	231.625
