# Supplementary material for: Asymmetric neurogenic commitment of retinal progenitors involves Notch through the endocytic pathway
Source: eLife. 2020 Nov 3;9:e60462. doi: 10.7554/eLife.60462 (PMC7679139; doi:10.7554/eLife.60462)
Supplement: Figure 2—figure supplement 1—source data 1. [file elife-60462-fig2-figsupp1-data1.xlsx]

## Sheet: Average velocity per cell
These velocities are the mean for all the cells measured in the time interval (basal migration)
	Ath5-			Ath5+
	-0.0410138	0.0410138		-0.0830759	0.0830759
	-0.227145	0.227145		-0.124793	0.124793
	-0.144069	0.144069		-0.281828	0.281828
	-0.141614	0.141614		-0.239766	0.239766
	-0.0683586	0.0683586		-0.119883	0.119883
	-0.178069	0.178069		-0.139862	0.139862
	-0.0893862	0.0893862		-0.0704552	0.0704552
	-0.0683517	0.0683517		-0.0736069	0.0736069
	-0.194897	0.194897		-0.123386	0.123386
	-0.0630966	0.0630966		-0.112166	0.112166
	-0.170359	0.170359		-0.220834	0.220834
	-0.0238345	0.0238345		-0.0771103	0.0771103
	-0.0294414	0.0294414		-0.128993	0.128993
	-0.105166	0.105166		-0.141634	0.141634
	-0.0399655	0.0399655		-0.122	0.122
	-0.0494345	0.0494345		-0.226441	0.226441
	-0.109366	0.109366		-0.182979	0.182979
	-0.124786	0.124786		-0.191393	0.191393
	-0.0809724	0.0809724		-0.139862	0.139862
	-0.0988552	0.0988552		-0.135655	0.135655
	-0.0578414	0.0578414		-0.085531	0.085531
	-0.0434621	0.0434621		-0.231352	0.231352
	-0.0347034	0.0347034		-0.0169862	0.0169862
	-0.0600621	0.0600621		-0.0855379	0.0855379
	-0.140138	0.140138		-0.0909655	0.0909655
	-0.0409379	0.0409379		-0.0167931	0.0167931
	-0.0881724	0.0881724		-0.0755793	0.0755793
	-0.0619241	0.0619241		-0.0965655	0.0965655
	-0.040931	0.040931		-0.144848	0.144848
	-0.176338	0.176338		-0.084131	0.084131
	-0.0112138	0.0112138		-0.169303	0.169303
	-0.0515241	0.0515241		-0.0673034	0.0673034
	-0.120931	0.120931		-0.129517	0.129517

## Sheet: Average velocity per time point
	Ath5-			Ath5+
5	-0.160618	0.160618		-0.201744	0.201744
10	-0.301945	0.301945		-0.218601	0.218601
15	-0.272624	0.272624		-0.122018	0.122018
20	-0.297673	0.297673		-0.114915	0.114915
25	-0.122273	0.122273		-0.212376	0.212376
30	-0.128358	0.128358		-0.203339	0.203339
35	-0.13157	0.13157		-0.253327	0.253327
40	-0.165545	0.165545		-0.11003	0.11003
45	-0.195242	0.195242		-0.151261	0.151261
50	-0.0933091	0.0933091		-0.185642	0.185642
55	-0.0733818	0.0733818		-0.051697	0.051697
60	-0.120976	0.120976		-0.125388	0.125388
65	-0.098497	0.098497		-0.0856848	0.0856848
70	-0.109	0.109		-0.106679	0.106679
75	-0.0436485	0.0436485		-0.139503	0.139503
80	0.0309697	-0.0309697		-0.211224	0.211224
85	0.0319879	-0.0319879		-0.0968121	0.0968121
90	-0.118879	0.118879		-0.0818242	0.0818242
95	-0.0530909	0.0530909		-0.117448	0.117448
100	-0.00249091	0.00249091		-0.0913091	0.0913091
105	-0.0562667	0.0562667		-0.0630727	0.0630727
110	-0.123152	0.123152		-0.118648	0.118648
115	-0.00684242	0.00684242		-0.126606	0.126606
120	-0.0667818	0.0667818		-0.114261	0.114261
125	0.0944788	-0.0944788		-0.0953394	0.0953394
130	0.00797576	-0.00797576		-0.108533	0.108533
135	-0.0834061	0.0834061		-0.0998182	0.0998182
140	0.0167636	-0.0167636		-0.0414909	0.0414909
145	0.0278061	-0.0278061		-0.0688	0.0688

## Sheet: Integnal Mean
Ath5 negative	Ath5 positive
4.47096	7.62804
23.4292	18.3024
11.4574	24.6855
15.1214	21.7034
6.10426	11.6596
22.3592	15.2189
9.70931	6.26213
5.00441	4.48505
23.0834	14.9967
9.93111	15.2513
13.831	21.7918
3.65358	8.60904
6.33763	15.4417
8.32482	17.8374
4.56077	10.3186
6.0425	22.3487
10.9446	17.6409
12.8744	22.99
11.625	12.6774
7.61001	16.2434
9.56503	10.2098
4.86991	22.3194
6.87323	8.90581
5.44148	11.1494
13.5423	8.28209
6.5639	5.36501
10.6161	13.3761
9.35988	11.488
3.44123	13.692
17.552	7.9659
1.54146	23.7664
9.68613	10.3568
11.511	13.185
