# Supplementary material for: Asymmetric neurogenic commitment of retinal progenitors involves Notch through the endocytic pathway
Source: eLife. 2020 Nov 3;9:e60462. doi: 10.7554/eLife.60462 (PMC7679139; doi:10.7554/eLife.60462)
Supplement: Figure 2—source data 1. [file elife-60462-fig2-data1.xlsx]

## Sheet: Figure2C_Difference MaxBasalPos
		Difference between sister cells
Cell 1 17-02		25.213
Cell2 17-02		11.895
Cell 12 17.01		3.05
Cell 13 17.01		10.182
Cell 8 5-02		18.755
Cell 2 20-01		6.252
Cell 3 20-01		14.028
Cell 4 20-01		22.109
Cell 1 20-01		10.063
Cell 1 17-01		11.181
Cell 3 17-01		7.471
Cell 4 17-01		0.712
Cell 6 17-01		4.574
Cell 9 17-01		6.505
Cell 10 17-01		7.929
Cell 11 17-01		30.699
Cell 1 2-02-2016		2.135
Cell 1 19.04.2018		4.481
Cell 2 19.04.2018		4.371
Cell 3 19.04.2018		13.57
cell 1 20190226		15.219
Cell 3 23.07		7.002
Cell 4 23.07		16.591
Cell 1 5-02-2016		9.759
Cell 5 17-01-2016		4.727
Cell 7 17-01-2016		11.589
cell 2 20190226		8.357
Cell 1 23.07		3.957
Cell 2 23.07		3.451
Cell 12 17-01		3.05
Cell 13 17-01		11.79
Cell 7 17-02		11.793
Cell 5 17-02		24.702
Cell 1 10-10-19		5.784
Cell 4 17-02		0.762

## Sheet: Figure2D_Ath5+_most basal
	Ath5-	Ath5+
Cell 1 17-02	-8.54	-33.753
Cell2 17-02	-12.658	-24.553
Cell 12 17.01	-12.808	-15.858
Cell 13 17.01	-16.857	-27.039
Cell 8 5-02	-23.787	-42.542
Cell 2 20-01	-19.67	-25.922
Cell 3 20-01	-11.182	-25.21
Cell 4 20-01	-18.298	-40.407
Cell 1 20-01	-14.334	-24.397
Cell 1 17-01	-24.601	-35.782
Cell 3 17-01	-13.114	-20.585
Cell 4 17-01	-36.189	-36.901
Cell 6 17-01	-9.911	-14.485
Cell 9 17-01	-19.721	-26.226
Cell 10 17-01	-26.379	-34.308
Cell 11 17-01	-14.028	-44.727
Cell 1 2-02-2016	-14.028	-16.163
Cell 1 19.04.2018	-25.82	-30.301
Cell 2 19.04.2018	-24.6	-28.971
Cell 3 19.04.2018	-22.568	-36.138
cell 1 20190226	-10.028	-25.247
Cell 3 23.07	-16.741	-23.743
Cell 4 23.07	-5.935	-22.526
Cell 12 17-01	-12.808	-15.858
Cell 13 17-01	-15.249	-27.039
Cell 7 17-02	-5.082	-16.875
Cell 5 17-02	-18.602	-43.304

## Sheet: Figure2E_Ath5-_most basal
	Ath5-	Ath5+
Cell 1 5-02-2016	-38.222	-28.463
Cell 5 17-01-2016	-17.536	-12.809
Cell 7 17-01-2016	-38.832	-27.243
cell 2 20190226	-24.279	-15.922
Cell 1 23.07	-16.133	-12.176
Cell 2 23.07	-16.641	-13.19
Cell 1 10-10-19	-39.267	-33.483
Cell 4 17-02	-23.177	-22.415

## Sheet: Figure2F_Difference_MaxBasalPos
Ath5+ more basal	Ath5- more basal
25.213	9.759
11.895	4.727
3.05	11.589
10.182	8.357
18.755	3.957
6.252	3.451
14.028	5.784
22.109	0.762
10.063
11.181
7.471
0.712
4.574
6.505
7.929
30.699
2.135
4.481
4.371
13.57
15.219
7.002
16.591
3.05
11.79
11.793
24.702

## Sheet: Figure2G_Ath5+ trajectories
t[min]	Cell 1 2-02	Cell1 5-02	Cell 3 view2 5-02	Cell 1 17-01	Cell 3 17-01	Cell 4 17-01	Cell 5 17-01	Cell 6 17-01	Cell 7 17-01	Cell 9 17-01	Cell 10 17-01	Cell 12 17-01	Cell 13 17-01	Cell 1 17-02	Cell 2 17-02	Cell 1 19-04	Cell 2 19-04	Cell 3 19-04	Cell 1 20-01	Cell 2 20-01	Cell 3 20-01	Cell 4 20-01	Cell 1 26-02	Cell 2 26-02	Cell 2 23-07	Cell 1 23-07	Cell 3 23-07	Cell 4 23-07	Cell 1 10-10-19	Cell 7 17-02	cell 5 17-02	Cell 4 17-02
0	0	0	0	0	0	0	0	0	0	0	0	0	0	0	0	0	0	0	0	0	0	0	0	0	0	0	0	0	0	0	0	0
5	0	-1.22	0.305	-2.44	-2.592	1.067	-0.763	-0.305	-4.676	-0.813	-2.44	1.017	-1.016	-3.253	-3.66	-1.728	-0.203	-1.068	0	0.457	-0.61	-1.22	1.055	-1.495	-3.855	-0.609	0	-0.153	-0.457	0	-0.61	-1.068
10	-0.458	-2.033	-1.678	-2.033	-4.727	-1.525	1.677	-0.305	-2.847	-4.269	-4.879	0	-0.813	-4.473	-0.915	-6.201	-3.05	-5.489	-1.83	-3.202	0	-1.83	-0.968	-1.935	-5.885	-3.501	0.456	-0.153	-0.457	-1.22	-1.372	-1.373
15	-0.915	-3.863	-4.422	-2.44	-3.812	-0.915	-0.61	1.525	-0.813	-5.692	-4.422	-2.643	-2.643	-7.32	0.762	-8.437	-3.863	-8.387	-1.83	-2.287	0.61	-1.83	-3.079	-2.551	-4.667	-4.262	-0.457	-0.609	-0.761	-2.033	-2.592	-1.525
20	0	-4.88	-3.66	-5.693	-3.202	-2.44	-0.61	0.305	-1.423	-5.489	-3.507	-3.049	-5.286	-5.49	0.762	-9.251	-3.761	-10.826	-1.983	-3.355	0.203	-5.032	-2.991	-1.407	-5.073	-6.088	-0.305	-1.218	-2.74	-2.44	-3.507	-1.83
25	-0.458	-3.253	-9.912	-8.133	-3.659	-2.593	-0.61	0.458	-1.627	-7.929	-3.355	-3.659	-7.725	-7.93	0.61	-9.047	-4.981	-9.302	-3.355	-7.014	0.813	-6.862	-4.047	-3.166	-5.479	-8.066	-0.761	-3.044	-2.435	-4.066	-7.014	-1.678
30	-1.373	-4.27	-12.046	-11.995	-4.422	-2.897	-0.305	-0.914	-4.473	-5.489	-7.014	-4.472	-7.725	-7.117	1.372	-10.877	-5.794	-12.809	-2.288	-8.692	1.423	-7.015	-2.991	-7.917	-5.682	-11.11	-0.457	-5.936	-3.501	-4.27	-8.691	-1.983
35	-1.983	-7.319	-14.486	-11.385	-3.812	-1.525	-0.61	-0.914	-6.099	-5.286	-8.082	-5.286	-11.791	-8.133	-3.965	-12.3	-10.572	-16.926	-1.983	-11.131	0.813	-10.369	-2.639	-12.227	-7.102	-12.48	0.152	-7.001	-3.196	-3.863	-9.149	-1.678
40	-2.745	-6.709	-16.621	-11.792	-3.507	-0.915	-0.153	-1.677	-5.49	-6.505	-13.723	-7.725	-13.215	-8.947	-5.033	-13.622	-11.08	-19.823	-2.745	-9.759	0.203	-8.539	-2.199	-13.723	-4.87	-12.176	-0.914	-6.697	-3.196	-2.847	-10.369	-2.745
45	-2.593	-8.336	-19.213	-11.995	-3.659	-0.153	-0.61	-0.61	-7.929	-8.132	-19.365	-8.132	-14.638	-9.76	-5.643	-16.366	-13.113	-20.738	-3.66	-8.539	-0.813	-12.351	-2.727	-9.764	-4.667	-11.871	-2.131	-7.154	-2.74	-1.83	-10.826	-4.117
50	-2.593	-15.248	-19.975	-13.825	-3.812	0.61	-0.458	-0.305	-9.149	-10.775	-20.432	-9.148	-12.605	-12.2	-3.66	-19.823	-13.723	-21.5	-5.795	-10.369	-1.22	-12.809	-2.375	-13.107	-6.29	-11.11	-2.892	-7.001	-3.348	-2.237	-11.436	-5.185
55	-1.983	-17.281	-21.348	-11.385	-3.354	0.61	0.152	-1.219	-9.149	-10.572	-22.262	-8.742	-11.385	-10.777	-1.83	-21.246	-14.13	-21.805	-10.674	-11.284	-1.627	-17.993	-3.607	-10.996	-7.102	-8.371	-4.718	-7.306	-2.283	-2.643	-10.521	-5.337
60	-1.068	-19.924	-21.195	-11.995	-3.202	0.305	-0.458	-0.762	-10.572	-10.775	-24.092	-8.335	-13.621	-11.183	-4.88	-21.957	-15.35	-23.94	-12.199	-12.046	-1.83	-20.738	-2.727	-11.436	-8.523	-8.523	-3.653	-9.132	-2.435	-1.423	-9.759	-4.88
65	-0.915	-20.534	-21.958	-12.402	-4.117	-0.61	-0.458	-1.524	-11.182	-10.978	-24.549	-8.945	-14.638	-12.403	-5.338	-23.177	-15.858	-20.128	-13.876	-13.266	-2.033	-20.433	-2.727	-12.227	-9.537	-8.219	-3.957	-9.589	-2.892	-1.423	-10.521	-5.49
70	-0.915	-21.754	-22.11	-14.435	-3.659	-0.61	-0.458	-1.982	-11.182	-11.588	-25.159	-9.352	-16.061	-13.827	-5.643	-23.381	-15.147	-21.957	-16.163	-13.113	-2.033	-23.482	-1.584	-13.459	-10.552	-4.87	-4.718	-7.458	-3.805	-4.066	-11.741	-6.862
75	-0.763	-23.787	-23.94	-14.638	-3.812	-0.915	-0.915	-1.067	-12.402	-12.808	-31.716	-7.522	-16.874	-13.623	-4.88	-25.312	-15.147	-22.262	-18.451	-13.113	-0.813	-24.245	-2.111	-13.459	-10.958	-3.805	-6.088	-7.458	-5.175	-6.1	-14.638	-6.557
80	-3.507	-23.787	-26.532	-16.062	-5.184	-4.27	-1.525	-0.914	-15.452	-14.231	-30.801	-8.945	-18.094	-13.827	-4.423	-26.43	-16.265	-21.957	-17.383	-13.266	-1.83	-26.532	-3.519	-14.603	-12.378	-4.87	-7.61	-7.001	-6.24	-7.523	-17.383	-6.862
85	-5.185	-22.974	-25.617	-18.298	-5.947	-6.557	-2.44	0.153	-18.704	-13.418	-32.021	-10.165	-17.281	-12.607	-4.423	-27.447	-17.586	-21.805	-16.621	-13.266	-3.863	-28.514	-4.927	-15.218	-10.552	-5.936	-7.001	-6.545	-7.153	-7.523	-16.925	-8.234
90	-3.66	-24.804	-26.837	-23.584	-5.947	-7.014	-3.355	-0.61	-19.924	-14.028	-33.088	-9.352	-17.687	-12.403	-5.643	-29.175	-19.009	-21.195	-14.943	-12.199	-5.286	-30.802	-5.366	-15.394	-9.943	-4.566	-7.458	-5.632	-7.914	-7.523	-14.486	-8.844
95	-2.745	-23.381	-30.039	-25.414	-9.606	-9.149	-5.642	-0.762	-19.314	-14.638	-32.326	-9.962	-18.704	-13.42	-5.49	-30.496	-19.518	-22.262	-13.876	-12.656	-7.523	-32.326	-3.959	-14.866	-9.537	-3.501	-8.371	-8.523	-7.306	-7.726	-14.028	-9.454
100	-1.983	-21.754	-30.649	-27.65	-11.741	-12.351	-7.472	-1.067	-17.891	-15.248	-34.003	-11.385	-19.517	-15.25	-5.033	-30.395	-19.924	-23.482	-14.029	-14.486	-7.929	-30.192	-3.871	-15.482	-9.132	-3.957	-9.437	-10.198	-5.175	-8.336	-12.503	-9.454
105	-1.068	-25.21	-32.174	-28.667	-12.656	-15.706	-8.692	0.153	-18.095	-14.841	-34.308	-11.181	-19.11	-15.047	-3.355	-31.208	-20.941	-23.94	-15.096	-13.418	-8.742	-31.564	-4.751	-15.306	-9.334	-3.196	-8.219	-10.045	-5.327	-7.929	-13.723	-8.387
110	-2.288	-23.381	-35.833	-31.513	-12.198	-15.096	-6.709	-0.914	-17.891	-16.468	-32.936	-12.198	-20.94	-15.86	-4.118	-32.123	-24.295	-23.33	-17.078	-13.876	-8.539	-33.394	-2.463	-14.251	-9.943	-2.74	-9.893	-10.502	-5.479	-10.166	-14.638	-8.997
115	-2.44	-26.024	-39.035	-32.326	-11.893	-11.741	-8.844	-3.202	-18.908	-16.671	-31.411	-13.824	-22.567	-15.86	-7.32	-32.123	-24.499	-26.074	-19.213	-13.571	-7.726	-34.461	-2.727	-13.635	-9.537	-3.653	-8.067	-11.567	-6.849	-9.962	-14.943	-9.607
120	-2.897	-22.771	-38.883	-29.277	-14.333	-12.199	-10.521	-4.574	-19.721	-15.451	-31.259	-15.858	-23.99	-17.893	-10.828	-32.326	-25.109	-24.397	-21.653	-14.791	-7.116	-35.071	-2.287	-13.459	-10.958	-3.957	-9.437	-13.394	-7.762	-9.352	-17.23	-9.759
125	-4.727	-21.551	-39.035	-31.92	-13.723	-15.401	-12.809	-3.812	-17.078	-17.484	-28.819	-12.808	-22.973	-15.453	-9.76	-33.851	-26.735	-25.922	-21.958	-16.011	-10.776	-33.546	-3.431	-15.13	-11.973	-3.501	-8.371	-14.611	-9.284	-10.572	-19.822	-10.827
130	-7.472	-20.331	-40.56	-33.546	-14.79	-19.213	-10.674	-7.624	-16.468	-17.687	-29.276	-11.995	-23.99	-15.25	-13.115	-32.936	-27.447	-26.074	-22.872	-17.23	-10.776	-33.851	-2.551	-13.987	-11.364	-4.109	-7.61	-14.916	-11.11	-12.402	-20.127	-9.759
135	-8.844	-20.128	-41.475	-35.782	-16.62	-19.975	-9.911	-8.843	-16.265	-18.501	-30.496	-10.775	-21.957	-17.283	-12.353	-33.038	-27.65	-27.599	-24.397	-18.755	-10.979	-34.309	-2.024	-12.579	-10.958	-4.414	-8.676	-15.524	-13.698	-13.215	-21.347	-8.692
140	-10.521	-17.485	-40.713	-33.749	-18.755	-19.67	-9.759	-8.691	-16.468	-18.501	-31.869	-10.775	-21.753	-18.3	-14.183	-32.733	-27.548	-26.684	-21.653	-19.975	-10.572	-34.614	-2.727	-11.963	-12.175	-3.653	-9.132	-15.677	-16.437	-14.435	-23.939	-8.539
145	-12.046	-18.095	-40.865	-34.766	-17.383	-20.28	-10.216	-10.673	-17.891	-16.264	-32.021	-11.181	-18.704	-20.537	-17.69	-32.834	-26.532	-27.752	-20.28	-19.67	-12.402	-33.546	-2.463	-12.403	-13.19	-2.435	-10.959	-14.002	-21.003	-12.199	-24.549	-9.759
150	-12.199	-18.095	-42.542	-34.766	-16.315	-19.823	-11.131	-11.283	-20.128	-17.687	-32.478	-10.978	-18.704	-19.723	-15.25	-33.444	-28.565	-26.532	-20.128	-24.092	-15.248	-33.241	-3.167	-13.107	-11.364	-2.892	-14.002	-14.307	-25.113	-10.572	-25.312	-9.149
155	-11.741	-19.111	-41.475	-32.936	-15.095	-22.72	-10.064	-11.588	-18.298	-18.704	-32.478	-11.995	-19.517	-21.553	-14.183	-32.834	-28.971	-23.025	-20.28	-27.142	-16.062	-32.021	-6.95	-14.163	-10.552	-2.892	-16.59	-14.155	-25.265	-8.133	-25.007	-10.827
160	-11.894	-21.347	-40.56	-33.343	-16.01	-19.365	-9.759	-12.655	-20.128	-19.72	-32.478	-11.588	-21.55	-24.4	-12.505	-32.326	-28.463	-24.702	-19.67	-26.684	-15.045	-32.784	-7.829	-15.218	-10.755	-3.653	-17.807	-14.763	-26.026	-7.726	-25.922	-12.351
165	-12.046	-22.974	-39.645	-32.123	-14.79	-20.28	-8.234	-13.723	-19.314	-19.924	-30.954	-11.181	-20.127	-24.4	-14.335	-31.411	-28.362	-25.769	-22.872	-24.854	-14.028	-29.734	-7.478	-15.922	-11.161	-4.414	-21.46	-15.22	-26.482	-9.556	-27.446	-12.046
170	-12.046	-22.974	-40.56	-30.496	-15.553	-20.28	-9.149	-14.485	-18.298	-20.737	-30.344	-10.775	-21.347	-23.383	-13.115	-30.395	-27.65	-27.752	-21.653	-24.092	-12.605	-32.174	-7.038	-14.954	-11.364	-3.957	-21.612	-15.524	-30.287	-10.776	-27.751	-10.064
175	-12.351	-22.771	-40.865	-31.92	-15.095	-18.298	-9.911	-10.826	-18.501	-21.144	-29.124	-13.215	-19.517	-27.45	-14.183	-29.073	-26.328	-29.429	-17.688	-24.092	-13.215	-32.326	-7.917	-11.7	-11.161	-4.87	-22.069	-14.155	-30.592	-11.589	-28.971	-11.437
180	-12.656	-24.6	-39.798	-31.92	-15.095	-17.841	-10.979	-11.436	-19.518	-20.94	-30.039	-13.215	-23.38	-27.653	-15.708	-29.073	-26.125	-30.191	-17.688	-25.159	-13.825	-31.716	-8.357	-9.676	-11.567	-4.718	-23.591	-13.85	-29.374	-13.012	-29.734	-10.674
185	-13.571	-25.414	-39.798	-31.513	-16.315	-19.67	-11.284	-11.283	-19.924	-20.94	-27.447	-11.995	-24.6	-30.703	-17.08	-27.853	-28.158	-31.869	-18.146	-27.142	-15.452	-32.936	-8.885	-10.028	-9.74	-5.631	-23.591	-14.763	-31.048	-13.825	-31.411	-11.589
190	-14.791	-26.227	-38.73	-33.546	-16.62	-25.007	-9.911	-9.148	-19.314	-24.193	-26.074	-13.011	-27.039	-33.347	-16.165	-26.837	-28.362	-32.479	-15.553	-26.532	-15.045	-25.922	-9.149	-9.676	-9.334	-7.914	-21.46	-15.524	-31.961	-14.232	-32.021	-12.809
195	-15.248	-27.65	-37.816	-32.936	-16.925	-26.379	-12.046	-7.471	-19.518	-23.583	-25.617	-12.808	-25.616	-33.753	-16.775	-26.329	-28.768	-32.936	-14.943	-26.837	-13.825	-20.28	-9.325	-10.468	-7.711	-7.458	-21.004	-16.285	-31.353	-15.452	-33.088	-14.181
200	-14.943	-27.447	-37.053	-31.31	-17.078	-27.599	-8.997	-6.861	-19.721	-25.616	-24.397	-10.775	-23.99	-31.313	-15.403	-23.787	-27.142	-33.851	-15.858	-26.379	-16.062	-19.823	-10.469	-9.06	-7.711	-6.849	-20.547	-16.285	-33.483	-16.875	-34.156	-14.334
205	-15.553	-28.26	-35.528	-30.903	-15.705	-23.94	-11.436	-8.081	-19.314	-25.21	-20.89	-11.385	-20.33	-32.33	-15.098	-21.754	-26.227	-34.003	-17.688	-23.787	-17.078	-21.958	-12.58	-8.972	-7.102	-6.849	-20.547	-19.177	-31.961	-16.672	-35.223	-12.504
210	-14.029	-27.853	-35.833	-30.293	-16.925	-24.855	-10.369	-7.166	-19.924	-23.99	-15.096	-11.181	-21.55	-31.11	-14.488	-20.331	-25.109	-33.851	-18.298	-24.55	-15.248	-23.94	-13.987	-9.324	-7.305	-6.849	-20.851	-19.329	-31.961	-16.875	-36.9	-13.876
215	-14.334	-27.65	-35.986	-29.073	-16.62	-25.77	-8.997	-6.251	-21.551	-23.99	-7.777	-10.165	-20.33	-31.72	-14.64	-20.026	-24.905	-33.851	-18.755	-24.854	-16.468	-24.092	-13.987	-10.38	-6.899	-6.24	-20.699	-19.025	-31.048	-16.875	-39.492	-14.486
220	-13.876	-26.633	-35.376	-31.31	-17.383	-25.77	-9.454	-4.574	-21.144	-23.583	-1.982	-6.912	-17.687	-31.313	-14.64	-18.4	-22.262	-34.308	-18.146	-26.379	-18.095	-23.178	-15.131	-12.315	-6.696	-7.001	-20.395	-17.351	-29.07	-15.452	-41.475	-14.944
225	-12.809	-28.463	-34.156	-30.903	-18.45	-25.77	-10.979	-5.031	-21.551	-25.006	1.525	-2.236	-15.654	-30.093	-17.69	-17.586	-14.537	-34.461	-17.231	-25.617	-18.095	-26.685	-17.33	-13.459	-5.479	-6.849	-19.938	-17.351	-25.721	-11.792	-42.389	-14.029
230	-12.961	-26.837	-34.461	-29.683	-18.45	-26.989	-9.759	-2.592	-23.381	-26.226	2.135	-3.252	-15.248	-28.67	-16.318	-17.993	-14.638	-35.223	-13.724	-25.159	-17.891	-26.075	-15.659	-13.019	-5.885	-5.936	-22.221	-18.568	-22.221	-6.303	-43.152	-15.554
235	-13.876	-23.99	-34.004	-27.447	-19.67	-30.801	-9.149	-0.305	-26.024	-24.803		0.204	-13.215	-29.483	-18.148	-16.468	-11.385	-35.223	-10.826	-23.635	-19.111	-26.075	-17.154	-13.019	-7.102	-5.783	-20.699	-18.112	-17.807	-2.847	-43.304	-17.231
240	-14.334	-22.974	-34.156	-28.057	-18.602	-32.631	-8.692		-26.43	-23.99		2.034	-10.572	-31.313	-18.758	-0.915	-2.745	-36.138	-7.624	-18.45	-19.111	-24.855	-18.738	-13.723	-7.711	-6.697	-23.439	-17.503	-17.807	0	-42.847	-15.706
245	-15.401	-25.617	-34.766	-28.26	-18.602	-33.394	-8.387		-27.243	-24.397			-9.962	-30.297	-21.808	-1.525	0	-32.784	-4.575	-19.06	-17.485	-22.568	-18.21	-14.954	-6.493	-6.392	-22.678	-19.329	-13.698	-0.814	-42.999	-15.401
250	-15.553	-25.617	-32.479	-28.26	-18.602	-36.901	-7.624		-25.414	-21.55			-9.148	-30.5	-24.4		0.102	-32.784	0.915	-18.298	-18.095	-19.061	-21.377	-13.019	-9.132	-6.849	-22.526	-20.09	-6.088		-43.609	-15.096
255	-16.163	-24.804	-30.192	-23.787	-19.517	-31.564	-8.997		-24.194	-19.72			-6.709	-27.653	-24.553		0.203	-28.057	1.677	-14.181	-18.298	-19.365	-24.28	-15.042	-7.102	-5.936	-22.982	-19.938	-4.87		-43.304	-15.554
260	-15.858	-25.82	-29.582	-14.842	-20.585	-32.936	-8.997		-19.314	-9.758			-5.489	-27.857	-24.4			-21.5	1.372	-13.113	-19.518	-7.32	-18.738	-16.01	-7.711	-5.175	-23.591	-21.308	-4.566		-42.999	-17.078
265	-15.096	-26.837	-28.209	-8.336	-20.127	-28.209	-8.082		-18.704	-5.082			-0.813	-25.62	-21.35			-11.131	1.372	-8.997	-22.364	-9.607	-18.738	-15.394	-7.102	-5.175	-23.743	-22.069			-42.694	-17.383
270	-14.638	-25.007	-25.465	-5.693	-19.67	-27.142	-9.911		-13.215	-2.643			0.204	-24.807	-10.37			-5.185		-8.844	-22.567	-4.727	-18.65	-14.69	-6.899	-3.501	-22.373	-22.526			-42.389	-18.603
275	-11.894	-26.43	-23.177	-2.237	-18.145	-23.94	-8.692		-11.792	-0.813				-5.897	-9.303			-2.592			-25.21		-18.65	-15.042	-8.523	-2.74	-20.851	-20.851			-41.017	-18.603
280	-8.539	-25.21	-21.5	-2.44	-12.656	-20.89	-4.422		-1.627					0.813	-9.913			-2.745			-24.804		-19.354	-14.339	-7.305	-4.566	-21.612	-20.09			-39.797	-19.061
285	-6.557	-21.551	-22.415	-2.643	-11.436	-20.28	-3.66		-1.627					1.017	-6.253						-23.991		-23.928	-15.658	-9.132	-4.566	-19.938	-19.482			-36.748	-20.28
290	-4.27	-20.128	-22.72		-9.301	-18.146	-1.83		-1.22					-0.407	-4.575						-18.908		-25.247	-14.866	-8.726	-0.304	-22.678	-16.285			-34.308	-21.043
295	-3.05	-17.688	-21.195		-6.556	-19.365	-2.135							0.203							-18.298		-24.104	-13.635	-10.349	0.609	-21.156	-14.307			-34.156	-21.958
300	-1.83	-14.435	-21.195		-2.897	-19.06															-11.792		-22.784	-13.107	-11.77		-20.09	-13.698			-34.613	-22.415
305	-1.373	-9.556	-16.621		-3.964	-20.28															-11.995		-15.923	-13.019	-10.349		-19.329	-12.481			-35.07	-21.958
310		-7.116	-15.248			-19.365															-10.776		-14.075	-13.107	-10.755		-17.655	-10.502			-35.07	-19.518
315		-4.676	-12.351			-18.755															-4.27		-10.117	-13.547	-10.146		-16.742	-8.371			-32.936	-8.234
320		-2.033	-6.252			-17.536															-2.847		-7.478	-13.371	-9.74		-16.59	-5.936			-31.258	-4.575
325		0.203	-5.947			-13.419															-2.847		-6.51	-11.436	-8.726		-18,568*	-0.609			-26.989	-1.068
330		0.813	-4.27			-7.777															-2.847		-3.079	-6.949	-6.088		-18,721*	0.304			-15.858	0.457
335		0.61	-1.983			-1.83															-3.66		-0.88	-3.87	-4.058		-19,329*	0.608			-7.776	0.762
340			-1.525			0.61															-2.847			-4.486	-1.217		-18,873*	0.304			-6.557
345			-1.83			-0.458																		-2.903	-1.217		-17,960*	0.456			-2.592
350			-1.373																					-0.967			-17,351*	-0.305			-1.372
355			-1.83																					0.528			-19,025*
360			-2.135																					0.616			-19,025*
365																											-19,634*
370																											-19,482*
375																											-19,786*
380																											-18,873*
385																											-19,025*
390																											-17,503*
395																											-17,655*
400																											-18,112*
405																											-17,503*
410																											-15,981*
415																											-14,611*
420																											-13,242*
425																											-12,633*
430																											-12,937*
																											-12,481*
																											-10,959*
																											-9,437*
																											-9,284*
																											-7,154*
																											-6,849*
																											-6,697*
																											-6,240*
																											-5,784*
																											-3,501*
																											-3,197*
																											0,608*
																											0,761*

## Sheet: Figure2H_Ath5- trajectoried
t[min]	Cell 1 2-02	Cell1 5-02	Cell 3 view2 5-02	Cell 1 17-01	Cell 3 17-01	Cell 4 17-01	Cell 5 17-01	Cell 6 17-01	Cell 7 17-01	Cell 9 17-01	Cell 10 17-01	Cell 12 17-01	Cell 13 17-01	Cell 1 17-02	Cell 2 17-02	Cell 1 19-04	Cell 2 19-04	Cell 3 19-04	Cell 1 20-01	Cell 2 20-01	Cell 3 20-01	Cell 4 20-01	Cell 1 26-02	Cell 2 26-02	Cell 1 23-07	Cell 2 23-07	Cell 3 23-07	Cell 4 23-07	Cell 1 10-10-19	Cell 7 17-02	Cell 5 17-02	Cell 4 17-02
0	0	0	0	0	0	0	0	0	0	0	0	0	0	0	0	0	0	0	0	0	0	0	0	0	0	0	0	0	0	0	0	0
5	0.457	-5.083	0.61	-3.253	-0.915	-1.017	-0.763	-1.525	-3.66	-0.813	-0.152	-2.236	-0.204	0.305	-3.965	3.253	-1.118	1.829	-0.763	0.305	1.017	-1.22	-0.176	-0.967	-1.675	0	-1.674	-0.152	-0.152	-1.016	-0.915	-1.067
10	-1.373	-9.759	-0.305	-3.66	-1.678	-4.067	-3.05	-2.897	-5.083	-2.44	-0.457	-5.286	0.813	-0.61	-5.795	0.915	-3.151	0.457	-1.83	-0.915	0.407	-0.153	0.88	-1.495	-5.023	-4.871	-3.044	-2.435	-0.456	-0.61	-4.117	-3.202
15	-2.592	-14.232	-0.915	-6.303	-0.61	-7.116	-4.727	-2.44	-5.49	-8.132	-1.982	-8.539	-2.44	-2.897	-7.015	-0.813	-2.439	-0.305	-2.593	-0.305	-0.203	0.457	0.968	-2.463	-6.697	-6.291	-5.174	-2.435	-1.522	-1.22	-6.709	-4.879
20	-4.575	-17.891	-3.05	-6.1	-2.287	-12.199	-5.795	-3.812	-7.319	-12.198	-2.439	-9.962	-5.286	-5.185	-9.303	-4.168	-1.321	-2.44	-2.135	-1.373	-1.22	-0.458	1.496	-2.199	-7.306	-4.465	-6.544	-3.196	-5.175	-1.423	-10.064	-7.167
25	-4.88	-18.298	-4.117	-5.286	-1.983	-14.029	-4.88	-4.727	-9.352	-14.638	-0.457	-11.385	-5.896	-3.202	-9.608	-5.286	-3.354	-0.915	-2.745	-3.05	-0.813	-3.202	0.44	-5.014	-10.502	-5.479	-6.544	-3.348	-4.718	-1.829	-11.283	-7.167
30	-4.575	-18.908	-5.337	-8.133	-3.05	-17.282	-5.642	-5.489	-10.979	-18.298	-1.83	-10.165	-4.473	-2.44	-6.71	-6.302	-3.557	-4.727	-1.678	-3.66	0	-2.897	0.264	-6.861	-12.328	-8.118	-5.935	-2.892	-5.479	-0.813	-12.503	-7.319
35	-5.947	-19.924	-5.947	-11.182	-2.897	-20.128	-6.709	-5.489	-10.776	-18.298	-3.049	-10.978	-7.32	-2.135	-5.643	-8.945	-3.252	-7.32	-2.135	-3.812	0	-2.745	0.792	-8.621	-14.003	-9.944	-5.935	-2.739	-4.261	1.017	-13.571	-7.319
40	-4.88	-18.908	-6.709	-12.402	-2.592	-21.551	-7.929	-7.319	-12.605	-17.281	-4.422	-9.758	-8.743	-2.135	-7.778	-9.454	-4.066	-9.607	-1.983	-4.727	0.204	-5.185	0.264	-9.852	-16.133	-12.988	-5.479	-3.196	-5.479	0	-16.62	-7.014
45	-5.49	-22.567	-7.777	-15.452	-3.05	-22.568	-10.674	-6.099	-15.452	-19.721	-4.574	-11.385	-8.946	-3.05	-10.98	-10.165	-4.574	-10.217	-1.83	-4.27	-0.61	-7.929	-2.991	-9.94	-15.829	-14.408	-5.327	-2.892	-5.175	0.204	-18.45	-7.167
50	-4.88	-25.82	-10.979	-13.622	-1.983	-25.007	-8.844	-5.642	-18.095	-18.501	-4.269	-12.808	-8.743	-3.05	-11.743	-11.588	-5.692	-10.064	-2.44	-5.642	-0.813	-10.521	-4.046	-9.236	-14.916	-12.785	-6.849	-2.739	-4.718	-0.61	-18.297	-8.996
55	-3.812	-28.463	-11.436	-15.045	-1.373	-24.601	-9.149	-7.167	-20.331	-17.688	-5.337	-11.791	-9.353	-1.677	-12.658	-10.978	-7.624	-8.844	-3.508	-5.794	-2.846	-12.046	-3.783	-9.764	-14.307	-11.77	-7.457	-3.044	-5.175	-1.016	-18.45	-10.369
60	-3.66	-31.513	-10.674	-15.858	-2.745	-26.43	-9.454	-7.624	-25.617	-16.468	-5.337	-12.198	-10.166	-2.44	-10.98	-12.402	-7.624	-11.132	-4.88	-6.709	-3.863	-12.504	-2.287	-13.019	-14.155	-9.944	-7.61	-2.739	-5.327	-0.61	-18.602	-9.606
65	-3.66	-31.919	-12.656	-15.045	-3.507	-25.007	-10.064	-8.387	-26.024	-13.825	-7.929	-11.182	-14.232	-2.745	-11.743	-13.825	-8.843	-8.234	-7.929	-5.947	-5.286	-14.029	-2.639	-12.051	-14.764	-10.147	-8.523	-3.653	-5.783	-1.423	-16.773	-10.826
70	-4.422	-31.513	-14.028	-18.095	-3.507	-24.194	-9.454	-8.692	-24.397	-13.621	-8.539	-12.808	-16.468	-3.355	-10.828	-16.366	-7.827	-9.759	-8.844	-4.727	-4.676	-14.943	-3.343	-13.635	-16.133	-10.147	-9.284	-3.805	-6.697	-1.016	-14.333	-16.315
75	-5.947	-32.326	-15.706	-18.298	-4.88	-24.397	-8.997	-7.777	-24.397	-12.808	-10.064	-8.945	-16.875	-3.812	-1.525	-18.094	-9.453	-10.369	-10.217	-5.642	-5.082	-15.553	-4.838	-14.163	-15.22	-11.567	-9.893	-3.5	-8.066	-1.626	-12.503	-19.213
80	-5.185	-31.716	-16.773	-16.468	-5.947	-25.007	-9.911	-8.234	-24.6	-12.198	-11.283	-6.709	-15.045	-5.795	-0.915	-19.822	-9.758	-10.979	-11.284	-6.252	-3.863	-15.401	-7.301	-15.482	-12.785	-11.77	-8.979	-3.653	-8.98	-1.016	-9.606	-17.993
85	-8.997	-31.716	-17.688	-16.875	-4.575	-25.82	-10.369	-6.862	-25.617	-10.978	-14.79	-6.302	-8.946	-4.27	-0.915	-20.636	-9.86	-9.912	-11.284	-5.794	-2.236	-16.163	-8.357	-16.098	-9.132	-12.988	-7.001	-2.587	-8.371	-1.423	-8.691	-19.365
90	-13.876	-32.936	-17.84	-12.809	-3.965	-27.04	-11.741	-7.319	-30.903	-11.792	-14.943	-5.082	-7.726	-6.252	-1.678	-21.55	-11.893	-10.674	-9.149	-6.862	-3.659	-16.011	-9.237	-18.473	-8.828	-13.8	-6.696	-2.283	-11.567	-0.61	-8.996	-18.45
95	-14.028	-32.936	-20.738	-11.589	-6.557	-28.057	-12.199	-8.692	-32.733	-11.588	-12.656	-4.472	-6.303	-5.795	-1.525	-22.567	-14.129	-10.827	-8.844	-5.794	-4.066	-18.298	-11.084	-18.473	-7.306	-12.988	-8.066	-2.892	-13.089	-1.016	-9.759	-18.603
100	-13.114	-31.919	-21.042	-13.012	-6.709	-26.43	-13.571	-6.709	-34.359	-10.572	-12.351	-3.253	-6.303	-7.32	-1.525	-24.702	-15.349	-12.046	-9.912	-4.88	-4.269	-16.926	-9.061	-18.473	-8.067	-12.785	-8.066	-4.109	-13.089	-0.813	-8.996	-18.145
105	-12.656	-34.766	-21.042	-13.215	-6.557	-26.837	-13.419	-7.319	-36.799	-9.759	-13.266	-3.659	-7.523	-7.015	-0.305	-25.413	-16.976	-11.894	-9.454	-4.727	-5.692	-15.858	-6.949	-20.057	-6.24	-13.394	-7.61	-4.261	-12.937	-1.626	-8.081	-20.432
110	-12.046	-38.222	-21.805	-15.655	-9.149	-25.617	-14.333	-7.929	-38.832	-11.182	-12.351	-3.659	-9.353	-8.387	-1.983	-25.82	-16.162	-11.894	-8.997	-6.557	-6.506	-17.231	-5.982	-20.145	-5.479	-11.973	-8.066	-4.109	-12.784	-1.829	-8.386	-21.195
115	-12.504	-37.815	-23.482	-16.062	-7.319	-24.804	-15.401	-5.794	-37.612	-10.978	-12.351	-4.879	-10.369	-7.93	-5.795	-23.888	-15.044	-11.894	-8.997	-7.929	-5.896	-15.248	-5.718	-19.969	-5.936	-14.002	-8.066	-4.109	-13.698	-1.22	-9.606	-22.872
120	-10.979	-37.205	-23.482	-14.435	-7.167	-23.381	-17.536	-6.252	-38.222	-12.808	-15.4	-5.692	-9.759	-7.32	-7.778	-22.872	-17.281	-13.571	-8.997	-7.319	-5.896	-14.181	-7.829	-21.2	-5.936	-14.611	-8.979	-3.653	-12.176	-2.439	-10.673	-23.177
125	-8.387	-36.595	-23.177	-13.825	-7.014	-23.381	-17.536	-6.252	-36.799	-13.215	-17.078	-6.099	-9.556	-4.422	-6.863	-21.855	-18.399	-12.809	-9.302	-6.862	-7.319	-10.217	-8.357	-20.936	-6.088	-12.379	-9.588	-3.805	-11.567	-3.049	-9.759	-21.957
130	-8.082	-34.562	-23.482	-15.858	-8.997	-25.211	-14.791	-5.947	-28.463	-16.468	-19.212	-5.489	-10.166	-4.727	-9.15	-21.144	-18.805	-12.809	-11.132	-6.709	-6.709	-8.082	-9.676	-20.848	-5.479	-13.597	-9.284	-3.5	-13.85	-3.456	-8.691	-19.975
135	-8.387	-34.562	-23.787	-20.738	-11.284	-25.617	-15.858	-6.557	-29.073	-11.792	-20.737	-5.489	-12.402	-6.557	-8.388	-19.416	-19.212	-13.419	-12.351	-7.319	-6.912	-6.405	-10.204	-19.705	-6.088	-11.567	-8.523	-3.957	-19.938	-2.236	-9.454	-19.365
140	-6.557	-36.189	-23.025	-19.925	-9.759	-26.227	-15.858	-7.167	-28.057	-11.792	-23.329	-5.489	-13.622	-5.947	-9.303	-16.264	-19.72	-12.199	-13.419	-7.777	-5.692	-3.812	-9.325	-19.705	-7.154	-11.77	-8.979	-3.805	-22.373	-2.643	-8.539	-17.688
145	-5.947	-32.936	-20.89	-20.534	-9.912	-25.82	-12.961	-9.911	-28.26	-9.149	-24.702	-4.269	-15.249	-5.795	-7.168	-15.858	-18.094	-11.741	-14.334	-8.387	-6.302	-5.032	-8.709	-20.32	-5.936	-12.785	-8.979	-5.935	-25.569	-1.626	-7.471	-17.535
150	-6.099	-36.392	-18.45	-20.534	-13.114	-21.348	-11.284	-9.149	-29.886	-10.369	-23.939	-3.456	-15.249	-5.337	-6.71	-15.655	-20.94	-9.149	-12.351	-8.387	-8.539	-5.337	-8.445	-19.793	-7.001	-14.408	-8.523	-5.022	-28.765	-1.423	-9.149	-18.298
155	-5.947	-36.595	-17.993	-20.534	-11.589	-21.754	-10.826	-8.234	-32.529	-11.995	-24.702	-5.692	-12.606	-7.167	-7.015	-16.061	-23.38	-8.082	-13.571	-9.759	-7.522	-4.422	-8.093	-20.32	-7.61	-16.641	-10.045	-4.87	-29.678	-2.236	-9.606	-20.585
160	-6.862	-36.189	-16.926	-21.348	-11.589	-19.925	-11.284	-7.777	-33.953	-11.385	-23.939	-4.676	-13.419	-7.625	-6.71	-14.028	-23.583	-9.302	-11.894	-11.284	-6.099	-5.185	-7.741	-21.552	-7.306	-15.626	-11.11	-4.566	-31.961	-2.643	-10.368	-20.737
165	-5.642	-35.579	-16.621	-20.534	-11.741	-21.348	-11.894	-6.099	-31.919	-10.978	-25.159	-6.505	-11.996	-7.472	-7.015	-13.723	-24.396	-10.522	-13.114	-12.504	-5.286	-5.032	-8.533	-24.279	-8.067	-17.046	-11.719	-3.805	-33.635	-3.456	-10.978	-19.365
170	-3.507	-35.986	-14.791	-19.925	-12.504	-21.348	-13.114	-3.355	-30.496	-9.149	-24.092	-6.099	-11.386	-8.082	-7.015	-13.113	-24.6	-12.961	-13.419	-12.961	-3.253	-5.642	-7.037	-22.256	-8.067	-15.829	-12.937	-3.044	-35.157	-3.863	-11.436	-19.213
175	-2.592	-35.376	-13.418	-20.331	-11.741	-22.161	-12.961	-1.525	-29.683	-10.369	-25.007	-5.489	-11.182	-8.54	-8.083	-11.69	-24.091	-15.706	-11.437	-13.876	-3.456	-5.337	-6.422	-19.617	-7.915	-15.829	-13.85	-3.957	-33.788	-5.082	-10.978	-20.28
180	-4.27	-35.986	-13.723	-23.787	-11.589	-23.177	-13.114	-0.763	-29.683	-9.759	-25.007	-4.676	-10.979	-7.472	-8.083	-10.165	-23.583	-15.858	-11.132	-14.486	-5.082	-4.727	-9.764	-17.769	-7.154	-15.829	-12.784	-3.805	-34.244	-3.456	-11.588	-21.652
185	-5.185	-35.376	-12.656	-24.601	-12.199	-26.43	-12.656	-0.153	-28.667	-10.165	-24.854	-4.879	-12.606	-7.625	-8.998	-8.234	-22.872	-17.841	-11.589	-15.401	-6.099	-4.575	-8.093	-18.385	-2.892	-14.611	-12.023	-3.5	-35.766	-2.846	-10.521	-22.262
190	-4.27	-36.189	-12.961	-22.568	-10.216	-26.43	-12.046	-0.305	-28.26	-10.165	-25.159	-4.472	-12.809	-6.252	-9.15	-6.404	-22.872	-19.061	-10.064	-14.333	-6.099	-8.082	-8.357	-18.473	-3.805	-13.8	-12.176	-4.718	-38.354	-3.049	-10.216	-22.262
195	-3.812	-36.595	-12.656	-19.925	-9.149	-28.87	-10.369	-0.61	-29.073	-10.165	-25.007	-3.456	-10.776	-4.422	-9.15	-4.676	-21.652	-19.061	-11.132	-14.943	-6.099	-8.692	-5.19	-17.066	-3.349	-12.176	-12.176	-4.261	-38.506	-3.253	-10.521	-22.415
200	-4.117	-36.799	-13.266	-20.331	-10.216	-30.293	-10.064	-1.22	-31.106	-11.588	-25.617	-1.829	-8.539	-3.355	-8.54	-3.964	-19.924	-18.603	-12.351	-15.096	-6.709	-6.252	-6.158	-16.45	-2.283	-12.379	-13.545	-4.261	-37.745	-3.049	-11.436	-20.585
205	-2.44	-36.799	-14.181	-21.805	-6.862	-30.09	-7.014	-1.22	-30.293	-10.165	-24.244	-1.626	-8.743	-3.812	-9.303	-3.456	-18.805	-18.756	-11.589	-16.011	-5.896	-6.557	-7.301	-18.561	-3.349	-13.8	-14.154	-3.957	-39.115	-2.846	-10.673	-19.06
210	-2.287	-36.799	-14.333	-21.958	-5.032	-29.48	-3.05	-2.592	-29.073	-7.929	-26.379	0.61	-8.743	-3.507	-8.693	-2.44	-20.127	-20.128	-10.827	-15.706	-5.692	-6.557	-4.662	-17.417	-2.74	-14.408	-16.133	-3.957	-38.201	-2.643	-10.826	-14.791
215	-1.982	-36.799	-14.181	-23.584	-4.422	-31.106	-2.592	-2.897	-29.276	-8.539	-25.769		-7.116	-1.83	-8.693	-3.151	-19.415	-19.366	-10.369	-17.231	-4.676	-4.27	-3.079	-16.626	-2.436	-12.582	-16.741	-3.957	-38.049	-2.033	-11.436	-12.656
220	-2.287	-35.376	-11.741	-24.601	-3.507	-33.343	-1.83	-1.22	-26.837	-9.555	-26.226		-6.303	-2.897	-7.93	-2.44	-18.805	-19.518	-10.369	-19.823	-3.253	-2.745	-6.598	-17.857	-1.979	-14.002	-15.98	-3.957	-39.267	-1.423	-12.503	-10.369
225	-1.83	-35.579	-10.826	-24.601	-2.44	-35.376	-1.83	-1.22	-25.21	-7.929	-23.939		-5.286	-4.117	-8.235	-0.915	-16.162	-18.451	-11.284	-17.84	-5.489	-1.22	-8.005	-18.297	-1.218	-14.611	-15.98	-3.957	-36.527	-1.423	-11.588	-6.252
230	-1.525	-30.496	-9.454	-23.381	-2.135	-36.189		-1.677	-21.551	-7.522	-19.212		-6.303	-4.27	-7.625	-1.525	-17.281	-18.756	-11.894	-21.5	-6.302	-0.458	-7.037	-15.834	-0.761	-13.8	-15.524	-4.566	-35.157	-1.016	-10.368	-6.709
235	-1.525	-27.65	-8.082	-19.518	-1.983	-34.359			-13.215	-7.319	-15.553		-6.1	-3.965	-8.998	0.407	-15.959	-20.585	-11.894	-19.365	-4.066	0	-7.829	-15.13	-1.827	-13.191	-16.589	-4.261	-34.244	-0.61	-10.368	-3.507
240	-1.525	-25.617	-5.642	-19.518		-33.953			-9.556	-4.473	-11.741		-5.49	0.458	-8.998	0.508	-9.555	-22.568	-13.724	-20.433	-3.456	-0.305	-5.454	-15.482	-1.979	-12.785	-16.133	-4.718	-29.831	0.204	-9.606	-2.287
245	-1.525	-26.227	-5.794	-18.298		-35.376			-6.303	-2.236	-5.032		-4.473		-9.913	-1.22	-7.115	-20.89	-12.961	-18.755	-3.049	-1.068	-10.028	-14.514	-2.588	-12.988	-15.524	-5.479	-20.394	0.204	-8.996	-1.677
250	-1.982	-22.974	-4.27	-16.265		-35.376			-3.456	-1.22	-0.457		-1.83		-9.303	-0.406	-7.42	-19.061	-12.656	-19.213	-7.116	-0.915	-8.885	-11.963	-1.37	-11.567	-12.176	-5.631	-16.589	0.204	-8.996	-1.677
255	-1.678	-18.908	-3.965	-14.639		-32.326			-0.813	-1.22	2.135		-0.204		-9.913		-5.489	-15.096	-9.607	-19.213	-7.725	-0.153	-7.301	-9.412	-0.914	-11.973	-11.262	-5.631	-14.002	0	-9.149	-0.457
260	-1.068	-15.858	-2.745	-10.776		-28.057				-1.626	2.287		2.642		-9.15		-3.354	-10.674	-5.49	-14.791	-9.962	-1.068	-6.246	-6.861	-1.218	-10.147	-10.501	-5.479	-12.784	0	-8.996	0.152
265	-0.305	-17.078	-1.677	-7.116		-22.568				0			1.219		-9.15		-2.134	-1.525	-5.795	-14.791	-9.555	-1.525	-5.63	-5.63	-1.066	-11.567	-9.74	-4.87	-13.698	-1.016	-7.929	1.067
270	0.305	-14.232	-0.915	-5.083		-20.534				-0.813					-4.423		0	0.914	-4.27	-9.149	-11.182		-8.357	-3.254	0.304	-8.32	-10.958	-4.718	-13.241		-3.049	-0.762
275	0.152	-15.858	-5.642	-1.627		-16.875				-1.016					-5.338				-4.575	-6.099	-11.182		-8.797	1.496	0.913	-7.103	-11.719	-3.957	-9.284		-1.067	-0.61
280	0.152	-12.605	-4.117	-0.814		-10.572									-6.405				-2.288	-5.642	-10.165		-9.501	3.255	2	-6.291	-11.567	-3.957	-6.088		-0.457	-0.457
285	-0.305	-12.199	-4.727	-0.61		-5.083									-2.135				-1.525		-8.539		-8.709	3.519		-4.668	-11.567	-3.653	-5.022		0.763	-0.457
290	0.762	-10.166	-2.745			-1.22									-2.135				-0.915		-8.335		-8.269			-3.45	-11.567	-3.653	-3.957		0.915	-0.152
295	0.915	-6.709	-2.287			-0.204									-1.83				2.744		-7.522		-6.598			-1.827	-11.719	-2.892	-3.805			-0.305
300	1.067	-5.896	-1.677			0.203									-2.135				2.439		-6.912		-4.574			-0.812	-11.567	-2.435				-0.457
305		-4.676													-1.83				1.524		-6.302		-2.727			-0.812	-10.349	-2.131				-0.457
310		-4.473													-2.288				1.829		-6.302		-1.671			-0.812	-10.806	-1.522
315		-2.237													-1.22						-6.709		0.264			-0.812	-10.349	-1.522
320		0.406													-0.915						-6.302		0.88				-10.958	-1.522
325		-0.203													-0.763						-6.506		1.232				-10.349	-1.522
330		-2.033													-0.305						-5.489		1.848				-11.415	-1.37
335		0.406													0.152						-6.912						-10.654	-2.131
340		1.016													0.457						-5.692						-10.045	-2.131
345		1.016													0.152						-4.066						-9.588	-2.892
350		-1.22																			-1.83						-9.132	-2.739
355																					-3.659						-9.588	-2.739
360																					-2.846						-10.349
365																					-2.033						-10.958
370																					-3.659						-10.501
375																					-2.643						-8.675
380																					-1.83						-8.675
385																											-8.218
390																											-7.61
395																											-7.153
400																											-7.305
405																											-7.153
410																											-6.544
415																											-6.544
420																											-5.631
425																											-4.566
430																											-6.392
																											-5.783
																											-3.653
																											-1.978
																											-1.37

## Sheet: Figure2K_Ath5+_Ath5-Trajectorie
Time	Cell1 Ath5-	Cell 1 Ath5+	Cell 2 Ath5-	Cell 2 Ath5+	Cell 3 Ath5-	Cell 3 Ath5+	Cell 6 Ath5+	Cell 6 Ath5-	Cell 7 Ath5 -	Cell 7 Ath5+	Cell 9 Ath5+	Cell 9 Ath5-	Cell 8 Ath5+	Cell 8 Ath5-	Cell 10 Ath5+	Cell 10 Ath5-
0	0	0	0	0	0	0	0	0	0	0	0	0	0	0	0	0
5	0	0.49	-0.489	-0.163	-2.827	-3.261	0.543	1.196	0	-2.446	-0.109	-0.218	-7.145	-6.475	-1.876	-2.293
10	-0.326	0.327	0.326	0.326	-4.783	-6.523	-1.739	-0.652	-1.794	-5.707	-2.5	0.435	-13.397	-14.514	-2.97	-2.293
15	-0.653	0.163	0	0.652	-6.305	-8.045	-2.935	-5.653	-5.381	-8.154	-5.544	-1.196	-19.426	-19.873	-4.376	-2.501
20	-0.49	0	-0.163	0.163	-7.827	-8.914	-6.305	-8.48	-5.055	-10.926	-5.436	-1.848	-21.883	-25.455	-4.22	-1.459
25	-0.49	-0.326	-0.815	0	-14.785	-9.349	-9.132	-10.545	-6.523	-11.741	-7.392	-1.848	-22.999	-31.484	-4.22	-3.543
30	0	0.49	-1.794	-0.489	-16.742	-13.698	-16.633	-17.068	-6.686	-13.209	-7.936	-2.392	-23.669	-31.708	-3.908	-3.543
35	0	0.163	-1.305	-0.653	-19.133	-15.654	-12.502	-21.308	-6.36	-14.187	-9.132	-2.174	-25.902	-33.047	-4.845	-2.501
40	0.163	0.653	-1.305	-0.653	-21.308	-16.741	-13.698	-21.743	-6.686	-16.144	-10.98	-2.066	-25.902	-30.814	-5.627	-2.918
45	2.935	0.979	-1.794	-1.957	-23.699	-19.568	-11.415	-23.808	-5.381	-16.796	-11.197	-3.153	-21.436	-28.972	-4.22	-2.293
50	-0.163	-1.956	-1.957	-1.631	-27.396	-21.307	-13.698	-26.2	-5.544	-14.513	-12.176	-4.349	-24.283	-30.145	-5.158	-2.501
55	0.489	-4.729	-0.979	-0.326	-31.092	-23.047	-15.328	-27.831	-4.729	-16.633	-12.502	-6.74	-23.111	-29.81	-7.346	-1.876
60	0	-4.239	-2.283	-3.099	-32.831	-25.438	-17.503	-32.505	-5.381	-18.101	-12.176	-5.762	-24.451	-31.987	-8.909	-2.084
65	-0.979	-6.359	-3.588	-5.055	-34.571	-26.743	-19.351	-36.093	-5.381	-18.59	-12.719	-7.284	-26.46	-34.164	-9.847	-2.501
70	-1.631	-7.664	-5.871	-5.708	-35.875	-27.395	-21.525	-37.723	-6.36	-17.938	-15.002	-7.284	-30.814	-36.006	-9.066	-1.459
75	-1.305	-8.316	-5.381	-5.055	-37.18	-25.656	-23.047	-35.658	-7.338	-19.405	-15.981	-7.393	-31.652	-38.853	-8.909	-1.251
80	-2.936	-10.436	-5.218	-7.338	-39.137	-25.221	-23.264	-33.049	-7.338	-21.199	-17.937	-7.393	-30.48	-40.528	-9.378	-2.084
85	-4.729	-9.947	-7.338	-9.295	-40.006	-28.482	-24.025	-32.831	-8.643	-22.34	-18.481	-7.61	-33.661	-42.538	-9.222	-3.126
90	-6.36	-11.741	-8.806	-6.849	-36.31	-29.787	-24.569	-32.94	-10.762	-22.177	-20.981	-8.697	-33.829	-41.868	-11.723	-2.501
95	-5.708	-12.393	-9.621	-7.828	-36.093	-30.874	-29.244	-32.396	-11.741	-23.482	-23.373	-10.98	-33.996	-41.03	-9.847	-1.876
100	-8.48	-12.393	-11.904	-8.317	-37.615	-33.483	-30.548	-34.462	-13.698	-24.786	-23.917	-13.698	-34.666	-41.533	-8.284	-1.667
105	-9.947	-13.697	-13.861	-8.969	-34.571	-35.005	-30.766	-33.81	-13.372	-24.623	-27.069	-15.981	-36.843	-43.542	-11.098	-3.96
110	-8.969	-15.98	-13.046	-7.664	-36.745	-38.919	-29.57	-34.353	-15.165	-24.786	-28.048	-16.524	-35.839	-46.222	-13.13	-1.876
115	-8.48	-16.469	-15.492	-7.664	-38.702	-41.963	-31.635	-35.114	-16.796	-22.83	-30.548	-18.046	-36.676	-46.389	-16.725	-0.209
120	-9.295	-18.752	-14.676	-7.991	-40.876	-44.572	-28.918	-33.266	-15.981	-23.971	-33.048	-18.59	-37.848	-46.557	-16.881	0.625
125	-9.458	-18.426	-14.187	-7.338	-41.311	-46.529	-30.766	-33.592	-18.59	-25.276	-33.266	-21.96	-39.021	-46.892	-19.851	0
130	-12.23	-21.362	-16.307	-6.849	-41.093	-47.833	-34.353	-33.592	-24.46	-22.993	-28.265	-21.308	-41.03	-46.389	-19.851	-1.667
135	-15.166	-24.134	-17.285	-8.317	-42.833	-49.138	-35.114	-32.614	-27.885	-20.221	-23.699	-17.938	-41.533	-47.227	-22.821	-2.084
140	-16.47	-24.297	-18.59	-8.317	-40.876	-47.833	-34.244	-32.288	-27.395	-20.71	-27.939	-20.873	-40.528	-45.887	-21.414	-0.625
145	-17.612	-27.395	-19.079	-8.969	-43.268	-47.616	-35.223	-32.505	-28.863	-19.731	-30.983	-23.808	-39.021	-46.557	-23.446	0.834
150	-19.405	-28.21	-21.199	-8.317	-40.441	-46.529	-35.005	-31.635	-30.657	-20.384	-33.266	-28.918	-38.853	-46.222	-23.29	-0.834
155	-20.384	-30.493	-20.547	-8.48	-41.311	-46.963	-40.658	-31.962	-33.266	-19.894	-35.984	-31.309	-36.006	-45.385	-25.322	0.834
160	-25.602	-33.755	-22.667	-10.437	-44.79	-47.398	-43.159	-33.049	-33.592	-20.71	-36.962	-33.483	-38.183	-44.38	-21.727	-0.834
165	-23.156	-34.896	-25.276	-14.676	-44.79	-48.703	-43.594	-34.571	-35.386	-22.014	-37.614	-32.831	-39.69	-43.71	-22.508	0.625
170	-21.036	-30.656	-27.233	-17.775	-45.007	-48.92	-43.376	-36.419	-37.18	-25.602	-35.223	-36.31	-40.36	-43.877	-22.352	0.208
175	-23.645	-26.254	-28.374	-19.895	-42.18	-47.833	-43.159	-37.397	-35.223	-27.396	-34.462	-38.484	-38.183	-42.035	-22.977	-3.126
180	-24.95	-30.33	-29.842	-21.199	-17.829	-45.224	-43.268	-40.006	-34.57	-30.005	-34.027	-39.028	-37.011	-42.035	-25.947	-4.377
185	-30.168	-31.961	-29.352	-20.384	-13.48	-44.572	-45.659	-42.507	-36.038	-32.125	-34.897	-39.245	-37.011	-42.035	-24.696	-3.126
190	-32.288	-35.059	-30.657	-22.83	-11.089	-45.659	-43.485	-37.18	-36.853	-32.94	-37.941	-40.876	-37.848	-42.203	-22.977	-9.379
195	-35.386	-36.201	-25.928	-17.285	-10.437	-46.311	-43.485	-33.375	-40.93	-33.103	-40.55	-42.18	-38.351	-43.71	-23.133	-13.13
200	-35.06	-38.158	-26.254	-17.285	-10.871	-47.181	-42.289	-29.679	-39.136	-32.777	-40.658	-42.289	-37.681	-42.37	-23.446	-16.048
205	-39.3	-36.038	-28.211	-18.427	-9.784	-45.659	-38.919	-34.571	-43.702	-33.103	-43.159	-45.551	-38.016	-42.538	-25.322	-15.631
210	-41.257	-36.038	-27.069	-16.959		-47.616	-43.376	-39.028	-44.355	-32.451	-44.898	-46.312	-37.681	-44.547	-25.947	-16.673
215	-42.887	-36.038	-28.537	-19.405		-48.703	-43.485	-36.419	-42.235	-34.734	-45.442	-48.703	-36.676	-43.375	-25.791	-18.549
220	-43.703	-39.299	-30.657	-22.993		-48.703	-42.289	-35.984	-35.386	-31.961	-47.29	-50.225	-37.011	-41.7	-27.354	-13.338
225	-45.823	-42.887	-32.125	-25.602		-48.485	-40.876	-35.984	-30.005	-31.472	-47.29	-50.008	-35.169	-41.868	-26.728	-13.338
230	-46.638	-44.68	-30.331	-25.113		-48.703	-38.702	-35.767	-35.386	-35.386	-47.398	-50.116	-35.839	-42.705	-27.823	-11.879
235	-47.127	-44.68	-29.189	-27.885		-46.311	-36.31	-32.396	-38.158	-38.973	-44.681	-45.224	-34.499	-42.203	-28.291	-11.671
240	-50.715	-47.452	-30.983	-29.516		-40.658	-32.505	-29.026	-36.853	-34.897	-34.679	-43.05	-33.661	-41.533	-28.291	-14.172
245	-50.878	-48.594	-34.571	-36.038		-34.353	-28.483	-27.831	-37.669	-36.527	-35.984	-42.072	-32.657	-42.035	-32.043	-26.051
250	-51.204	-47.942	-36.69	-38.158		-16.959	-26.091	-25.004	-35.875	-35.549	-29.461	-39.897	-32.657	-42.203	-39.077	-30.22
255	-51.53	-47.779	-41.419	-41.583		-8.697	-28.048	-22.069	-32.451	-30.657	-27.613	-39.897	-35.336	-43.542	-40.171	-27.719
260	-51.856	-48.431	-39.952	-41.42		-6.305	-27.178	-22.286	-32.777	-23.319	-34.788	-41.202	-35.504	-43.542	-42.672	-29.386
265	-51.856	-49.572	-41.583	-45.333		-6.523	-27.396	-21.417	-30.82	-3.588	-32.614	-44.681	-34.164	-43.542	-45.173	-34.596
270	-47.942	-46.148	-43.376	-48.758			-33.157	-25.765	-36.853	-2.609	-33.592	-45.116	-36.843	-45.552	-43.61	-38.764
275	-45.659	-37.505	-42.724	-50.062			-30.874	-27.178	-32.777	-1.631	-30.657	-45.985	-36.174	-44.715	-44.235	-42.724
280	-45.007	-38.321	-42.235	-49.247			-31.418	-26.852	-10.11	-1.794	-14.567	-45.333	-35.839	-44.715	-46.423	-37.514
285	-43.05	-31.309	-43.213	-49.247			-35.005	-27.178			-11.089	-42.072	-34.499	-43.375	-47.517	-31.678
290	-42.398	-29.515	-45.17	-45.822			-32.722	-31.744			-5.544	-26.091	-35.169	-43.375	-50.8	-30.011
295	-43.54	-30.82	-46.964	-33.266			-24.243	-30.874			3.479	-10.654	-35.336	-43.375	-50.331	-28.135
300	-47.942	-35.712	-44.518	-16.47			-18.807	-24.569			1.087	0.435	-35.336	-43.375	-50.018	-25.009
305	-47.942	-34.733	-45.985	-10.274			-11.85	-25.982			-2.066	-0.109	-35.504	-43.375	-51.112	-23.759
310	-48.595	-37.342	-45.333	-6.849			-9.023	-21.634			-0.978	-0.652	-36.174	-43.375	-53.144	-23.55
315	-48.595	-31.961	-48.268	-10.274			-5.653	-18.59			-0.544	-0.218	-36.006	-43.375	-54.082	-26.26
320	-44.844	-18.752	-49.573	-10.6				-13.372				0.326	-35.839	-44.38	-54.082	-28.344
325	-29.353	-12.882	-50.551	-11.415									-36.006	-44.38	-55.489	-29.803
330	-12.067	-7.175	-50.062	-10.6									-34.499	-44.38	-53.926	-28.969
335	-4.24	-0.652	-48.594	-10.11									-33.829	-44.38	-53.613	-32.512
340	-2.12	-0.815	-47.453	-10.11									-34.499	-44.38	-54.395	-37.514
345	-1.468		-39.136	-13.046									-35.839	-44.38	-54.551	-39.598
350	-0.816		-20.873	-12.883									-34.834	-44.38	-54.238	-37.722
355	-0.49		-16.47	-12.883									-35.336	-44.715	-53.301	-38.139
360													-35.336	-44.212	-50.956	-41.474
365													-35.169	-46.054	-50.643	-45.017
370													-35.169	-44.715	-49.549	-45.017
375													-35.169	-41.198	-50.018	-46.475
380													-32.992	-39.69	-48.611	-42.307
													-26.125	-36.676	-47.83	-37.305
													-17.752	-36.676	-46.579	-40.64
													-15.072	-32.657	-43.766	-40.432
														-33.829	-37.514	-41.474
														-28.972	-21.414	-39.181
														-33.327	-9.691	-27.093
														-32.489	-6.721	-19.382
														-29.14	-6.252	-7.503
														-25.79	-1.25	-3.543
														-26.46
														-25.958
														-22.273
														-18.254
														-18.422
														-15.909
														-13.732

## Sheet: Figure2K_MaxBasalPosition
	Ath5-	Ath5+
Cell 1	-51.856	-49.572
Cell 2	-50.551	-50.062
Cell 3	-45.007	-48.703
Cell 6	-42.507	-45.659
Cell 7	-43.702	-38.973
Cell 9	-50.225	-47.398
Cell 10	-46.475	-54.551
Cell 8	-47.227	-41.533
