# Supplementary material for: Asymmetric neurogenic commitment of retinal progenitors involves Notch through the endocytic pathway
Source: eLife. 2020 Nov 3;9:e60462. doi: 10.7554/eLife.60462 (PMC7679139; doi:10.7554/eLife.60462)
Supplement: Figure 3—source data 1. [file elife-60462-fig3-data1.xlsx]

## Sheet: Figure3A''_Notch1b
	ROI = 560 square micron
File	Slice	File + ROI	n	Spot mean	Image Mean	Partition Ratio per ROI
fish1_central	20/51
	1	fish1_central_GaussBlur_slice20_apical.tif	130	6377.0	1881.2	0.345745
	2	fish1_central_GaussBlur_slice20_central.tif	126	5108.3	1661.1	0.335106
	3	fish1_central_GaussBlur_slice20_basal.tif	120	4539.1	1587.7	0.319149
		total	376
	25/51
	1	fish1_central_GaussBlur_slice25_apical.tif	125	7058.4	1910.8	0.349162
	2	fish1_central_GaussBlur_slice25_central.tif	120	4415.3	1603.7	0.335196
	3	fish1_central_GaussBlur_slice25_basal.tif	113	4653.2	1558.0	0.315642
		total	358
	30/51
	1	fish1_central_GaussBlur_slice25_apical.tif	109	5510.6	1786.2	0.343849
	2	fish1_central_GaussBlur_slice25_central.tif	108	4012.5	1542.6	0.340694
	3	fish1_central_GaussBlur_slice25_basal.tif	100	4151.8	1512.3	0.315457
		total	317
fish1_nasal
	17/44
	1	fish1_nasal_GausBlur_slice17_apical.tif	125	5152.2	1781.5	0.338753
	2	fish1_nasal_GausBlur_slice17_central.tif	133	4537.7	1647.7	0.360434
	3	fish1_nasal_GausBlur_slice17_basal.tif	111	4160.2	1555.5	0.300813
		total	369
	22/44
	1	fish1_nasal_GausBlur_slice22_apical.tif	121	5229.7	1771.7	0.34375
	2	fish1_nasal_GausBlur_slice22_central.tif	119	4540.7	1583.3	0.338068
	3	fish1_nasal_GausBlur_slice22_basal.tif	112	3914.1	1492.3	0.318182
		total	352
	27/44
	1	fish1_nasal_GausBlur_slice24_apical.tif	89	5054.1	1653.8	0.340996
	2	fish1_nasal_GausBlur_slice24_central.tif	83	5423.6	1543.1	0.318008
	3	fish1_nasal_GausBlur_slice24_basal.tif	89	3520.6	1498.3	0.340996
		total	261
Fish 1 temporal
	14/38
	1	fish1_temporal_Gaussblur_slice14_apical.tif	110	7157.2	1900.3	0.324484
	2	fish1_temporal_Gaussblur_slice14_central.tif	107	6520.5	1756.4	0.315634
	3	fish1_temporal_Gaussblur_slice14_basal.tif	122	5849.3	1804.1	0.359882
		total	339
	19/38
	1	fish1_temporal_Gaussblur_slice19_apical.tif	104	7127.4	1841.1	0.322981
	2	fish1_temporal_Gaussblur_slice19_central.tif	98	6475.2	1672.2	0.304348
	3	fish1_temporal_Gaussblur_slice19_basal.tif	120	6365.2	1772.6	0.372671
		total	322
	24/38
	1	fish1_temporal_Gaussblur_slice24_apical.tif	104	6164.6	1725.2	0.334405
	2	fish1_temporal_Gaussblur_slice24_central.tif	114	4058.8	1541.4	0.366559
	3	fish1_temporal_Gaussblur_slice24_basal.tif	93	5196.4	1583.8	0.299035
		total	311
Fish 2 nasal
	16/44
		fish2_nasal_GausBlur_slice16_apical.tif	87	6202.3	2266.3	0.3625
		fish2_nasal_GausBlur_slice16_central.tif	81	6398.5	2006.0	0.3375
		fish2_nasal_GausBlur_slice16_basal.tif	72	4929.5	1858.8	0.3
		total	240
	20/44
		fish2_nasal_GausBlur_Slice20_apical.tif	93	6787.3	2263.5	0.356322
		fish2_nasal_GausBlur_Slice20_central.tif	94	6037.3	2017.0	0.360153
		fish2_nasal_GausBlur_Slice20_basal.tif	74	5139.8	1856.6	0.283525
		total	261
	24/44
		fish2_nasal_GausBlur_slice24_apical.tif	72	7087.0	2211.7	0.336449
		fish2_nasal_GausBlur_slice24_central.tif	75	4632.5	1831.0	0.350467
		fish2_nasal_GausBlur_slice24_basal.tif	67	5020.4	1853.0	0.313084
		total	214
Fish 2 central
	16/44
		fish2_central_GausBlur_apical.tif	77	4931.5	1930.8	0.363208
		fish2_central_GausBlur_central.tif	65	5018.4	1792.4	0.306604
		fish2_central_GausBlur_basal.tif	70	6826.7	5185.0	0.330189
		total	212
	20/44
		fish2_central_GausBlur_apical.tif	73	5359.4	1914.3	0.350962
		fish2_central_GausBlur_central.tif	72	4493.0	1737.7	0.346154
		fish2_central_GausBlur_basal.tif	63	3592.5	1605.9	0.302885
		total	208
	24/44
		fish2_central_GausBlur_apical.tif	69	4900.1	1872.3	0.361257
		fish2_central_GausBlur_central.tif	66	4182.0	1676.0	0.34555
		fish2_central_GausBlur_basal.tif	56	4404.6	1624.9	0.293194
		total	191
Fish 2 temporal
	16/44
	1	fish2_temporal_GausBlur_apical.tif	70	5532.3	2069.6	0.348259
	2	fish2_temporal_GausBlur_central.tif	60	4347.1	1710.3	0.298507
	3	fish2_temporal_GausBlur_basal.tif	71	4372.8	1736.4	0.353234
		total	201
	20/44
	1	fish2_temporal_GausBlur_apical.tif	68	4654.5	1862.4	0.314815
	2	fish2_temporal_GausBlur_central.tif	75	4685.3	1738.9	0.347222
	3	fish2_temporal_GausBlur_basal.tif	73	3967.6	1658.5	0.337963
		total	216
	24/44
	1	fish2_temporal_GausBlur-2.tif	67	5901.8	1965.6	0.36413
	2	fish2_temporal_GausBlur-2.tif	63	4126.2	1676.3	0.342391
	3	fish2_temporal_GausBlur-2.tif	54	3302.9	1577.6	0.293478
		total	184
Fish 3 nasal
	18/46
		fish3_nasal_GaussBlur_apical.tif	82	6192.5	2120.0	0.340249
		fish3_nasal_GaussBlur-2.tif	83	5134.9	1773.6	0.344398
		fish3_nasal_GaussBlur_basal.tif	76	4454.2	1684.4	0.315353
		total	241
	22/46
		fish3_nasal_GaussBlur_apical.tif	78	5699.1	1971.8	0.366197
		fish3_nasal_GaussBlur_central.tif	69	4403.1	1678.0	0.323944
		fish3_nasal_GaussBlur_basal.tif	66	3961.5	1585.2	0.309859
		total	213
	26/46
		fish3_nasal_GaussBlur_apical.tif	67	5363.5	1881.6	0.335
		fish3_nasal_GaussBlur-2.tif	62	4263.8	1610.1	0.31
		fish3_nasal_GaussBlur-2.tif	71	3820.8	1535.5	0.355
		total	200
Fish 3 central
	18/46
	1	fish3_central_GausBlur_apical.tif	82	5491.5	1948.7	0.316602
	2	fish3_central_GausBlur_centrall.tif	81	5281.9	1792.3	0.312741
	3	fish3_central_GausBlur_basal.tif	96	5298.7	1883.0	0.370656
		total	259
	22/46
	1	fish3_central_GausBlur_apical.tif	99	5498.5	1991.3	0.341379
	2	fish3_central_GausBlur_central.tif	94	4158.0	1682.7	0.324138
	3	fish3_central_GausBlur_basal.tif	97	4757.4	1750.1	0.334483
		total	290
	26/46
	1	fish3_central_GausBlur_apical.tif	92	5242.1	1908.5	0.334545
	2	fish3_central_GausBlur_central.tif	85	4120.5	1633.3	0.309091
	3	fish3_central_GausBlur-2_basal.tif	98	4019.9	1648.1	0.356364
		total	275
Fish 3 temporal
	18/46
	1	fish3_GausBlur_apical.tif	72	4948.6	1788.6	0.330275
	2	fish3_GausBlur_central.tif	78	4008.7	1599.1	0.357798
	3	fish3_GausBlur_basal.tif	68	3633.7	1518.6	0.311927
		total	218
	22/46
	1	fish3_GausBlur_apical.tif	78	5148.0	1742.4	0.348214
	2	fish3_GausBlur_central.tif	76	5182.0	1651.4	0.339286
	3	fish3_GausBlur_basal.tif	70	4620.1	1582.4	0.3125
		total	224
	26/46
	1	fish3_GausBlur_apical.tif	75	4643.4	1691.4	0.337838
	2	fish3_GausBlur_central.tif	75	4027.9	1576.3	0.337838
	3	fish3_GausBlur_basal.tif	72	3699.4	1528.3	0.324324
		total	222

## Sheet: Figure3B'_DeltaC
	ROI = 560 square micron
File	Slice	File + ROI	n	Spot mean	Image Mean	Partition Ratio per ROI
fish1_nasal	19/39	fish1_nasal_subtractBack15-apical.tif	96	12372.3	3371.3	0.34657
		fish1_nasal_subtractBack15-central.tif	98	12238.3	5323.1	0.353791
		fish1_nasal_subtractBack15basal.tif	83	6446.4	1896.2	0.299639
		tot	277
fish1_nasal	24/39
		fish1_nasal-slice24_SubtractBrack15-apical.tif	100	9884.7	2909.4	0.390625
		fish1_nasal-slice24_SubtractBrack15-central.tif	84	7722.8	2033.1	0.328125
		fish1_nasal-slice24_SubtractBrack15-basal.tif	72	6969.7	1629.9	0.28125
		tot	256
fish1_nasal	15/39
	1	fish1_nasal_Slice15-apical.tif	122	10093.1	3335.5	0.388535
	2	fish1_nasal_Slice15_central.tif	92	8437.6	2541.1	0.292994
	3	fish1_nasal_Slice15_basal.tif	100	7568.7	2154.9	0.318471
		tot	314
fish1_central	15/39
	1	fish1_central-Slice15_apical.tif	116	10170.7	3241.7	0.3625
	2	fish1_central-Slice15_central.tif	96	9739.6	2746.0	0.3
	3	fish1_central-Slice15_basal.tif	108	9154.2	2545.5	0.3375
		tot	320
fish1_central	20/39
	1	fish1_central-Slice20_SubtractBack15_apical.tif	121	9341.6	2863.3	0.382911
	2	fish1_central-Slice20_SubtractBack15_central.tif	103	7121.6	2213.5	0.325949
	3	fish1_central-Slice20_SubtractBack15_basal.tif	92	6513.5	1995.2	0.291139
		tot	316
fish1_central	25/39
	1	fish1_central-Slice25_SubtractBack15_apical.tif	116	8501.1	2646.9	0.363636
	2	fish1_central-Slice25_SubtractBack15_basal.tif	98	7358.2	2160.7	0.30721
	3	fish1_central-Slice25_SubtractBack15_basal.tif	105	5856.9	1819.2	0.329154
		tot	319
fish1_temporal	15/39
	1	fish1_temporal-Slice15_SubtractBack15_apical.tif	139	7897.1	2751.1	0.372654
	2	fish1_temporal-Slice15_SubtractBack15_central.tif	118	6995.8	2347.9	0.316354
	3	fish1_temporal-Slice15_SubtractBack15_basal.tif	116	7090.5	2193.4	0.310992
		tot	373
fish1_temporal	20/39
	1	fish1_temporal_slice20_apical.tif	108	7931.3	2512.7	0.376307
	3	fish1_temporal_slice20_central.tif	98	7978.5	2189.7	0.341463
	4	fish1_temporal_slice20_basal.tif	81	6403.6	1873.9	0.28223
		tot	287
fish1_temporal	25/39
	1	fish1_temporal-Slice15_SubtractBack25_apical.tif	97	7487.4	2335.3	0.331058
	2	fish1_temporal-Slice15_SubtractBack25-central.tif	107	6559.3	1945.1	0.365188
	3	fish1_temporal-Slice15_SubtractBack25_basal.tif	89	5250.4	1676.1	0.303754
		tot	293
fish2_nas	15/35
	1	fish2_nas_SubtrBack15_slice15_apical.tif	132	7942.8	2654.6	0.336735
	2	fish2_nas_SubtrBack15_slice15_central.tif	136	6382.9	2206.8	0.346939
	3	fish2_nas_SubtrBack15_slice15_basal.tif	124	6250.7	2091.4	0.316327
		tot	392
fish2_nas	20/35
	1	fish2_nas_SubtrBack15_slice20_apical.tif	102	7428.5	2362.2	0.341137
	2	fish2_nas_SubtrBack15_slice20_central.tif	99	7675.0	2116.9	0.331104
	3	fish2_nas_SubtrBack15_slice20_basal.tif	98	5878.5	1901.4	0.327759
		tot	299
fish2_nas	25/35
	1	fish2_nas_SubtrBack15_slice25_apical.tif	94	8202.0	2274.7	0.33452
	2	fish2_nas_SubtrBack15_slice25_central.tif	90	6140.3	1828.9	0.320285
	3	fish2_nas_SubtrBack15_slice25_basal.tif	97	6413.0	1797.0	0.345196
		tot	281
fish2_centr	15/35
	1	fish2_centr_SubtrBack15_slice15_apical.tif	128	9029.9	3058.9	0.333333
	2	fish2_centr_SubtrBack15_slice15_central.tif	134	9117.4	3075.1	0.348958
	3	fish2_centr_SubtrBack15_slice15_basal.tif	122	8326.5	2712.5	0.317708
		tot	384
fish2_centr	20/35
	1	fish2_centr_SubtrBack15_slice20_apical.tif	139	8404.2	2993.3	0.346633
	2	fish2_centr_SubtrBack15_slice20_central.tif	136	7903.2	2761.9	0.339152
	3	fish2_centr_SubtrBack15_slice20_basal.tif	126	7515.2	2583.1	0.314214
		tot	401
fish2_centr	25/35
	1	fish2_centr_SubtrBack15_slice25_apical.tif	107	8602.1	2723.1	0.323263
	2	fish2_centr_SubtrBack15_slice25_basal.tif	111	7523.5	2367.6	0.335347
	3	fish2_centr_SubtrBack15_slice25_basal.tif	113	8446.8	2615.2	0.34139
		tot	331
fish2_temp	15/35
	1	fish2_temp_Subtrack15_slice15_apical.tif	92	10937.9	2764.5	0.319444
	2	fish2_temp_Subtrack15_slice15_central.tif	93	8136.0	2378.3	0.322917
	3	fish2_temp_Subtrack15_slice15_basal.tif	103	6880.9	2215.7	0.357639
		tot	288
fish2_temp	20/35
	1	fish2_temp_Subtrack15_slice20_apical.tif	80	9689.4	2494.8	0.314961
	2	fish2_temp_Subtrack15_slice20_central.tif	90	7158.9	2059.8	0.354331
	3	fish2_temp_Subtrack15_slice20_basal.tif	84	7419.0	2118.8	0.330709
		tot	254
fish2_temp	25/35
	1	fish2_temp_Subtrack15_slice25_apical.tif	98	7594.7	2258.1	0.312102
	2	fish2_temp_Subtrack15_slice25_central.tif	107	5854.3	1929.2	0.340764
	3	fish2_temp_Subtrack15_slice25_basal.tif	109	5666.3	1959.8	0.347134
		tot	314

## Sheet: Figure3B'_DeltaC_morefish
	ROI = 560 square micron
File	Slice	File + ROI	n	Spot mean	Image Mean	Partition Ratio per ROI
fish2_nasal
	25/28
	1	fish2_nasal_GausBlur_apical.tif	60	56.0	44000	0.3
	2	fish2_nasal_GausBlur_central.tif	65	43.6	44058	0.325
	3	fish2_nasal_GausBlur_basal.tif	75	34.6	43936	0.375
		tot	200
	33/38
	1	fish2_nasal_GausBlur_apical.tif	61	44.8	44028	0.326203
	2	fish2_nasal_GausBlur_central.tif	68	32.2	43844	0.363636
	3	fish2_nasal_GausBlur_basal.tif	58	34.9	43844	0.31016
		tot	187
	38/38
	1	fish2_nasal_GausBlur_apical.tif	51	43.8	43876	0.349315
	2	fish2_nasal_GausBlur_central.tif	47	40.6	43874	0.321918
	3	fish2_nasal_GausBlur_basal.tif	48	32.5	13.0	0.328767
		tot	146
fish2_central
	25/28
	1	fish2_central_GausBlur_apical.tif	71	36.1	43937	0.312775
	2	fish2_central_GausBlur_central.tif	74	32.4	44087	0.325991
	3	fish2_central_GausBlur_basal.tif	82	31.2	43935	0.361233
		tot	227
	30/38
	1	fish2_central_GausBlur_apical.tif	85	34.1	44088	0.333333
	2	fish2_central_GausBlur_central.tif	81	30.3	43903	0.317647
	3	fish2_central_GausBlur_basal.tif	89	34.3	43965	0.34902
		tot	255
	35/38
	1	fish2_central_GausBlur_apical.tif	71	40.4	2020-08-14	0.322727
	2	fish2_central_GausBlur_central.tif	71	43.978	2020-09-11	0.322727
	3	fish2_central_GausBlur_basal.tif	78	44.008	2020-03-12	0.354545
		tot	220
fish2_temporal
	25/28
	1	fish2_temporal_GausBlur_apical.tif	44	38.5	2020-01-14	0.309859
	2	fish2_temporal_GausBlur_central.tif	44	33.2	2020-08-12	0.309859
	3	fish2_temporal_GausBlur_basal.tif	54	36.7	2020-06-13	0.380282
		tot	142
	30/38
	1	fish2_temporal_GausBlur_apical.tif	47	33.0	2020-07-12	0.350746
	2	fish2_temporal_GausBlur_central.tif	37	2020-09-27	2020-08-11	0.276119
	3	fish2_temporal_GausBlur_basal.tif	50	2020-01-27	2020-03-12	0.373134
		tot	134
	38/38
	1	fish2_temporal_GausBlur_apical.tif	30	2020-07-31	2020-07-11	0.326087
	2	fish2_temporal_GausBlur_central.tif	29	2020-05-28	2020-09-10	0.315217
	3	fish2_temporal_GausBlur_basal.tif	33	2020-08-27	2020-04-11	0.358696
		tot	92
