# Supplementary material for: Asymmetric neurogenic commitment of retinal progenitors involves Notch through the endocytic pathway
Source: eLife. 2020 Nov 3;9:e60462. doi: 10.7554/eLife.60462 (PMC7679139; doi:10.7554/eLife.60462)
Supplement: Figure 4—source data 1. [file elife-60462-fig4-data1.xlsx]

## Sheet: Figure4B_MSD_analysis
	Ath5+	Ath5+_sem	Ath5-	Ath5-_sem
5	3.33785	0.269418	2.46612	0.261337
10	7.96166	0.830844	5.77443	0.666011
15	13.4762	1.66203	9.59926	1.17506
20	19.5946	2.65304	13.7718	1.75614
25	26.3711	3.67777	18.0806	2.40785
30	33.6692	4.79798	22.5041	3.10611
35	41.5353	6.0052	26.989	3.83434
40	49.7203	7.39574	31.4888	4.63112
45	58.5878	8.955	36.0819	5.52185
50	67.6882	10.5209	40.6353	6.52862
55	77.0618	12.1483	45.4712	7.59955
60	87.0192	13.6455	50.2877	8.75241
65	97.0178	15.0354	55.101	9.98441
70	107.806	16.4846	60.1363	11.2973
75	118.76	17.8664	64.9527	12.603
80	129.925	19.2174	69.8117	13.8567
85	140.641	20.526	74.5311	14.9602
90	151.717	21.8636	78.9732	15.9576
95	163.014	23.0661	82.9289	16.8276
100	174.496	24.3084	86.8415	17.7489
105	185.894	25.6413
110	197.789	27.0407

## Sheet: Figure4C_BasalProcessinheritanc
	BP-	BP+
Cell 1 17-02	-8.54	-33.753
Cell 2 17-02	-12.658	-24.553
Cell 10 17-01	-26.379	-34.308
Cell 1 2-02	-16.163	-14.028
Cell 1 19.04.2018	-25.82	-30.301
Cell 3 19.04.2018	-22.568	-36.138
Cell 1 5-02	-28.463	-38.222
cell 1 20190226	-10.028	-25.247
cell 2 20190226	-15.922	-24.279
Cell 1 23.07	-12.176	-16.133
Cell 2 23.07	-13.19	-16.641
Cell 3 23.07	-16.741	-23.743
Cell 4 23.07	-5.935	-22.526
Cell 7 17-02	-5.082	-16.875
Cell 5 17-02	-18.602	-43.304
Cell 4 17-02	-22.415	-23.177

## Sheet: Figure4H_Ath5-NegativeCells_sta
Time	Cell 3 Ath5-	Cell 6 Ath5-	Cell 8 Ath5-	Cell 7 Ath5-	Cell 11 Ath5-	Cell 14 Ath5-	Cell 2 Ath5-	Cell 15 Ath5-	Cell 16 Ath5-
0	0	0	0	0	0	0	0	0	0
5	-1.355	-0.101	-0.191	-0.229	-0.304	0.878	-1.459	-1.842	-2.01
10	-2.606	-0.152	0.342	-0.533	-0.761	0.527	-3.648	-2.345	-2.456
15	-4.064	-0.558	0.152	-0.761	-1.065	-1.054	-4.273	-2.68	-2.903
20	-4.377	-0.761	-0.495	-0.229	-2.206	-1.932	-5.836	-5.359	-3.349
25	-3.543	-0.659	-1.637	0	-2.359	-0.351	-6.774	-7.871	-3.349
30	-4.273	-0.507	-2.93	-0.305	-3.576	-0.702	-6.357	-9.546	-2.903
35	-5.315	-0.456	-2.816	-0.761	-4.185	-1.405	-5.523	-11.221	-4.019
40	-7.086	-0.05	-3.273	-1.142	-4.033	-0.702	-6.044	-11.221	-6.029
45	-7.086	-0.659	-3.539	-0.685	-4.642	-0.176	-6.253	-12.561	-7.146
50	-8.441	-0.913	-0.952	0	-4.87	-0.702	-6.878	-14.57	-8.485
55	-9.796	-1.217	-0.343	-1.066	-5.555	-2.283	-7.295	-14.738	-9.378
60	-9.587	-0.964	-1.028	-1.066	-6.696	-5.62	-7.399	-11.891	-10.718
65	-10.421	-1.217	-2.664	-1.142	-6.696	-5.795	-8.962	-11.221	-12.058
70	-11.463	-1.877	-2.93	-1.218	-6.24	-5.444	-10.108	-12.561	-15.407
75	-11.255	-2.384	-2.512	-1.142	-6.24	-5.268	-12.609	-14.403	-16.971
80	-10.213	-1.674	-2.245	-0.533	-8.37	-4.917	-14.485	-14.235	-16.301
85	-11.776	-1.674	-1.37	-0.99	-8.903	-6.498	-12.818	-13.565	-17.417
90	-12.609	-2.029	-0.952	-0.913	-9.36	-8.254	-12.401	-13.565	-16.524
95	-11.255	-1.927	-2.74	-1.37	-9.284	-8.605	-12.609	-13.565	-16.747
100	-11.046	-1.623	-3.044	-0.685	-9.131	-10.186	-13.026	-13.565	-19.204
105	-10.317	-1.674	-2.169	-1.142	-7.914	-9.483	-13.651	-13.398	-19.65
110	-12.088	-2.283	-2.702	-0.685	-6.316	-10.712	-13.86	-14.068	-20.99
115	-13.443	-2.79	-3.044	-0.609	-4.794	-12.468	-13.234	-14.235	-22.106
120	-14.902	-2.283	-4.11	-0.761	-5.326	-11.59	-14.485	-12.728	-24.339
125	-16.361	-2.435	-3.882	-0.837	-4.946	-12.644	-13.86	-12.393	-22.33
130	-15.944	-2.688	-5.251	-0.913	-4.642	-14.927	-13.755	-11.723	-22.106
135	-16.361	-2.333	-5.974	-1.218	-0.684	-9.659	-13.234	-11.723	-22.106
140	-17.194	-2.13	-6.849	-1.979	0.229	-9.483	-14.068	-11.723	-21.66
145	-16.986	-1.674	-7.686	-4.49	0.761	-11.064	-15.006	-12.728	-22.106
150	-17.715	-1.217	-8.6	-5.099	1.142	-10.537	-13.234	-16.747	-18.31
155	-17.194	-1.166	-9.627	-4.11	1.142	-11.064	-13.755	-16.915	-16.077
160	-18.236	-1.42	-8.143	-4.49		-11.59	-16.777	-17.417	-16.077
165	-18.549	-1.674	-8.6	-4.642		-13.347	-16.256	-16.245	-15.407
170	-19.904	-1.623	-9.931	-5.479		-15.981	-16.152	-15.073	-16.971
175	-17.403	-1.674	-10.045	-5.784		-19.317	-16.152	-13.733	-17.864
180	-18.341	-1.775	-10.388	-6.164		-20.371	-15.839	-13.231	-18.757
185	-16.569	-1.725	-9.969	-7.382		-21.776	-16.673	-13.231	-17.194
190	-16.569	-1.42	-11.986	-7.23		-21.6	-18.236	-12.561	-16.747
195	-16.673	-1.369	-12.328	-8.219		-22.303	-17.298	-12.226	-16.077
200	-18.341	-2.283	-12.557	-7.686		-17.386	-17.715	-8.541	-15.631
205	-18.757	-2.739	-11.796	-7.306		-17.21	-17.194	-8.541	-16.301
210	-18.132	-2.942	-13.736	-6.393		-19.142	-18.549	-9.211	-16.524
215	-18.132	-3.044	-14.954	-5.479		-18.439	-17.819	-10.718	-13.175
220	-18.862	-2.688	-14.687	-5.023		-17.21	-16.673	-11.556	-13.621
225	-10.421	-3.044	-13.812	-5.327		-16.683	-16.882	-15.408	-12.951
230		-3.044	-13.888	-4.414		-16.332	-16.256	-16.078	-12.058
235		-3.145	-14.383	-4.11		-15.805	-14.902	-14.738	-12.058
240		-2.638	-14.421	-3.881		-12.995	-15.318	-12.728	-11.388
245		-3.246	-14.764	-3.349		-9.483	-16.361	-13.063	-10.942
250		-3.399	-15.106	-3.805		-11.064	-15.527	-12.058	-8.932
255		-2.841	-15.525	-2.74		-14.049	-13.651	-11.221	-7.815
260		-2.435	-16.057	-3.12		-15.981	-12.818	-11.221	-6.699
265		-2.333	-16.818	-2.816		-16.859	-10.629	-10.551	-4.019
270		-3.805	-16.362	-3.196		-18.088	-9.587	-9.211	-1.786
275		-3.449	-16.742	-3.044		-17.912	-8.858	-9.546	-2.233
280		-3.196	-16.818	-2.968		-19.317	-7.503	-9.714	-1.563
285		-2.993	-17.161	-2.055		-19.317	-6.669	-7.034	-2.68
290		-2.435	-16.362	-1.674		-18.966	-5.627	-8.374	-0.893
295		-2.232	-15.639	-0.837		-18.439		-9.044	-3.349
300		-2.536	-14.421	-1.446		-18.439		-10.551	-2.456
305		-2.08	-13.698	-1.674		-16.683		-11.053	-2.903
310		-2.13	-13.28	-2.055		-15.103		-9.881	-0.223
315		-1.369	-12.519			-15.278		-9.714	0.447
320		-1.166	-10.997			-15.278		-9.379	0.447
325		-1.319	-9.323			-15.981		-9.211	0.67
330		-1.268	-8.105			-15.981		-6.197	1.786
335		-1.166	-6.773			-16.859		-5.192	2.903
340		-1.166	-4.452			-15.278		-3.852	1.786
345		-1.319	-5.175			-13.873		-4.187	3.126
350		-1.116	-4.757			-12.82		-4.522	3.126
355		-1.268	-3.577			-10.361		-4.857	3.126
360		-1.775	-1.941			-2.459		-5.192
365			-0.533			-0.702		-5.192
370			0.951			-0.176		-5.192
375			1.331			-1.932		-5.024
380								-4.187
385								0.167
390								0.167
395								0.167
400								0.167
405
410
415
420

## Sheet: Figure4I_Ath5PositiveCells_stat
Time	Cell 2 Ath5+	Cell 6 Ath5+	Cell 8 Ath5+	Cell 7 Ath5+	Cell 11 Ath5+	Cell 12 Ath5+	Cell 13 Ath5+	Cell 14 Ath5+	Cel l15 Ath5+	Cell 16 Ath5+
0	0	0	0	0	0	0	0	0	0	0
5	0.521	-0.507	-0.875	-0.381	0.076	0.102	0.152	-0.702	-0.335	0
10	-1.042	-1.167	-1.712	-0.609	-0.761	-0.71	-0.305	0.176	-0.838	-2.01
15	-1.876	-1.218	-1.979	-0.761	-1.294	-1.319	-1.37	-0.176	-3.182	-1.786
20	-1.667	-1.674	-2.017	-0.609	-1.978	-1.014	-1.675	-0.527	-7.537	-2.233
25	-3.022	-1.167	-2.359	-0.533	-2.587	-1.42	-1.522	-0.527	-7.872	-2.456
30	-2.605	-1.065	-1.903	-0.457	-3.957	-2.333	-2.74	-1.405	-9.044	-2.233
35	-2.501	-1.065	-1.598	-1.446	-6.316	-2.841	-2.892	-0.702	-9.211	-0.67
40	-3.751	-0.71	-1.827	-2.588	-7.229	-2.536	-1.522	-1.229	-10.384	-0.223
45	-3.96	-1.015	-1.979	-2.816	-7.001	-2.739	-1.066	0	-12.058	-1.786
50	-3.856	-0.964	-0.913	-2.511	-7.762	-3.855	-3.501	1.054	-10.719	-1.786
55	-4.793	-0.964	-1.218	-1.903	-7.534	-3.754	-1.675	0.176	-10.886	-2.01
60	-4.898	-1.522	-0.343	-2.207	-7.305	-3.754	-4.871	-1.054	-11.388	-2.233
65	-6.252	-1.268	-0.343	-2.892	-6.62	-3.652	-6.088	-0.527	-11.556	-1.786
70	-6.773	-1.522	-0.114	-3.349	-6.316	-3.449	-6.545	-0.702	-12.393	-2.456
75	-9.066	-1.573	-0.076	-3.653	-7.229	-2.435	-6.849	-1.054	-12.058	-3.349
80	-9.066	-2.029	-0.571	-3.349	-5.783	-2.841	-7.002	-1.58	-12.393	-3.573
85	-8.024	-2.283	-0.457	-3.044	-5.555	-2.333	-7.61	-2.283	-12.896	-3.349
90	-7.294	-1.522	0.19	-3.805	-6.316	-2.739	-8.524	-1.932	-11.556	-4.019
95	-6.356	-1.471	-0.381	-3.272	-5.555	-3.348	-10.045	-2.985	-11.054	-4.466
100	-6.773	-1.268	-0.267	-3.577	-4.87	-2.536	-9.132	-1.932	-8.709	-6.252
105	-7.815	-1.877	0.228	-3.957	-5.479	-2.232	-9.132	-0.527	-8.541	-10.495
110	-7.503	-1.877	-0.038	-3.272	-8.142	-2.333	-10.502	-1.405	-7.872	-10.495
115	-7.398	-1.522	-0.381	-2.588	-7.381	-3.044	-11.567	-0.527	-8.709	-11.165
120	-7.919	-1.826	-0.533	-2.664	-7.077	-2.638	-13.394	-1.756	-9.881	-11.835
125	-7.919	-2.384	-1.484	-2.892	-5.859	-3.652	-13.242	0	-10.384	-12.951
130	-7.919	-3.653	-1.789	-3.196	-5.631	-3.957	-12.176	-0.702	-9.881	-12.058
135	-7.815	-3.957	-2.397	-2.968	-6.316	-3.246	-9.741	-1.229	-9.714	-12.505
140	-8.128	-4.566	-3.311	-3.501	-7.381	-4.667	-10.654	-2.634	-9.714	-14.514
145	-9.066	-4.464	-4.68	-3.501	-6.544	-2.942	-9.437	-3.337	-9.714	-13.621
150	-9.066	-4.464	-5.67	-3.729	-5.022	-2.333	-8.676	-3.161	-9.379	-11.835
155	-8.753	-4.414	-4.909	-4.642	-4.414	-2.333	-8.676	-4.566	-9.379	-12.058
160	-10.316	-4.464	-5.137	-6.012	-3.653	-2.942	-10.045	-3.688	-9.379	-12.728
165	-10.316	-3.653	-4.528	-6.24	-4.414	-2.333	-10.045	-4.741	-10.719	-12.728
170	-9.795	-4.515	-5.061	-7.154	-3.957	-3.449	-12.328	-4.566	-11.556	-12.058
175	-10.525	-4.414	-5.86	-7.534	-5.099	-5.783	-11.872	-5.795	-11.388	-11.835
180	-10.629	-4.515	-4.452	-9.132	-4.414	-4.058	-11.263	-6.146	-11.221	-10.495
185	-11.567	-4.617	-3.767	-9.741	-3.729	-3.957	-11.72	-5.093	-10.886	-10.272
190	-13.442	-4.769	-4.68	-9.056	-4.566	-4.261	-11.415	-5.971	-12.058	-9.155
195	-13.026	-5.175	-4.756	-9.513	-5.479	-4.565	-11.872	-5.268	-12.058	-9.155
200	-13.651	-5.581	-4.718	-9.893	-3.5	-5.174	-11.872	-5.268	-11.891	-10.495
205	-13.547	-5.327	-3.539	-10.121	-4.338	-5.174	-11.567	-6.498	-11.891	-10.495
210	-13.442	-5.581	-4.11	-10.045	-3.12	-4.768	-11.72	-8.429	-11.891	-8.485
215	-12.609	-5.53	-4.414	-10.502	-2.816	-5.276	-11.415	-8.429	-11.891	-7.145
220	-12.088	-6.494	-4.414	-10.502	-2.359	-5.479	-11.872	-8.078	-13.398	-6.252
225	-12.088	-6.747	-4.68	-10.274	-0.228	-5.58	-12.937	-8.605	-12.393	-7.369
230	-13.13	-7.255	-2.892	-9.969	-0.304	-5.276	-11.72	-8.605	-12.226	-8.039
235	-11.983	-7.813	-1.979	-9.513	0.076	-5.682	-11.72	-7.376	-12.561	-7.815
240	-11.775	-8.066	-1.865	-9.056	0.304	-6.595	-11.567	-6.849	-13.231	-7.369
245	-11.775	-7.255	-2.968	-8.599	0.228	-6.493	-11.567	-5.971	-12.226	-5.806
250	-7.607	-7.305	-2.626	-8.675	0.228	-6.29	-11.567	-5.971	-12.058	-5.806
255	-5.627	-7.103	-3.12	-8.143	0.837	-5.783	-11.567	-7.2	-12.561	-5.806
260	-4.377	-6.697	-4.072	-7.762	-1.674	-6.087	-11.567	-7.551	-12.058	-4.466
265	-3.647	-7.914	-5.175	-7.23	-1.75	-5.783	-12.024	-8.254	-12.058	-1.786
270	-2.605	-8.422	-3.881	-6.469	-1.75	-4.16	-12.024	-8.078	-13.733	-1.563
275		-9.335	-3.995	-7.914	-2.359	-3.855	-11.872	-8.605	-13.901	-1.116
280		-8.777	-2.664	-7.762	-2.892	-4.971	-11.72	-10.888	-14.738	-1.786
285		-8.32	-0.419	-7.382	-3.881	0.406	-11.567	-13.522	-14.738	-2.01
290		-7.711	-0.723	-3.729	-3.653	0.609	-9.589	-14.049	-14.068	-1.563
295		-7.001	-0.875	-0.609	-2.207	-0.101	-10.959	-11.942	-14.068	-0.223
300		-6.747	-3.729	-0.076		0.406	-10.806	-11.942	-13.901	-0.223
305		-5.479	-3.805	-0.229			-10.806	-13.698	-12.896	0.67
310		-4.109	-2.93	-0.076			-9.893	-11.766	-13.901
315		-2.79	-2.93				-9.589	-11.766	-13.063
320		-1.826	-2.169				-2.436	-12.468	-12.728
325		-1.065	-1.751				-2.74	-11.239	-12.561
330		-0.101	-0.381					-8.254	-12.058
335			0					-7.727	-12.226
340			0.418					-7.2	-12.896
345			0.647					-6.673	-13.231
350			0.723					-6.673	-13.566
355			0.761					-5.093	-14.57
360			0.609					-1.932	-14.236
365			0.494					-1.229	-14.57
370			0.799					-1.229	-14.738
375								-2.459	-14.905
380								-3.863	-11.388
385								-2.81	-10.719
390								-2.107	-5.694
395								-1.229	-5.359
400								-1.054	-4.857
405								-1.054	-3.685
410								-0.878	-4.02
415								-0.878	-2.01
420								0.176
